# Supplementary material for: Hydrogen-bonded intermediates and transition states during spontaneous and acid-catalyzed hydrolysis of the carcinogen (+)-anti-BPDE
Source: Royal Society of Chemistry journal article supplement (doi:10.1039/c4cp01310g), 2014-01-01
Supplement: c4cp01310g1.pdf [file c4cp01310g1.pdf]

# Hydrogen-bonded intermediate and transition states during spontaneous and acid-catalyzed hydrolysis of the carcinogen (+)-*anti*-BPDE

Mark C. Palenik,<sup>a</sup> Jorge H. Rodriguez,<sup>\*a</sup>

## Supplementary material

---

<sup>a</sup>*Theoretical and Computational Biomolecular Physics Group, Department of Physics and Astronomy, Purdue University, West Lafayette, IN, 47907, USA.*

*\* corresponding author, E-mail: jhrodrig@purdue.edu*

Table S1: Experimentally determined activation energies for BPDE hydrolysis under various conditions.

|                          |                   |                |               |
|--------------------------|-------------------|----------------|---------------|
| Spontaneous              | water             | 22.25 kcal/mol | Whalen [1]    |
| Spontaneous <sup>a</sup> | water             | 21.33 kcal/mol | Michaud [2]   |
| Acid catalyzed           | Hydronium         | 13.15 kcal/mol | Whalen [1]    |
| Buffer catalyzed         | Sodium cacodylate | 14.20 kcal/mol | Geacintov [3] |

<sup>a</sup> \*BPDE was in the conformation it takes on when intercalated in DNA

Activation barriers of Table were calculated in this work based on their corresponding experimental (kinetic) data [1,2] using the formula

$$k = \frac{k_B T}{c^0 h} e^{-\Delta G^\ddagger / K_B T} \quad (1)$$

which was inverted to find  $\Delta G^\ddagger$  in terms of k, where k is the reaction rate,  $c^0$  is the standard concentration of 1 M,  $k_B$  is Boltzmann’s constant, and h is Planck’s constant.

Table S2:  $\Delta E^{\text{KS}\ddagger}$  and  $\Delta G^\ddagger$  for three predicted transition states associated with (+)-*anti*-BPDE hydrolysis [kcal mol<sup>-1</sup>]. Energy differences defined in footnote.<sup>a</sup>

| XC         | 6-311g*                          |                     |                     |                       |                       |                       |                                  | 6-311+g*            |                     |                       |                       |                       |       |
|------------|----------------------------------|---------------------|---------------------|-----------------------|-----------------------|-----------------------|----------------------------------|---------------------|---------------------|-----------------------|-----------------------|-----------------------|-------|
|            | $\Delta E^{\text{KS}\ddagger^a}$ | $\Delta Z^\ddagger$ | $\Delta H^\ddagger$ | $-T\Delta S^\ddagger$ | $\Delta G^\ddagger^a$ | $\Delta G^\ddagger^s$ | $\Delta E^{\text{KS}\ddagger^a}$ | $\Delta Z^\ddagger$ | $\Delta H^\ddagger$ | $-T\Delta S^\ddagger$ | $\Delta G^\ddagger^a$ | $\Delta G^\ddagger^s$ |       |
| <b>TS1</b> | BPW91                            | 41.79               | -0.06               | 41.37                 | 8.98                  | 50.36                 | 48.47                            | 36.55               | 0.03                | 36.44                 | 8.11                  | 44.55                 | 42.66 |
|            | BLYP                             | 35.12               | 0.69                | 35.25                 | 9.62                  | 44.87                 | 42.98                            | 28.82               | 0.11                | 28.78                 | 8.46                  | 37.24                 | 35.35 |
|            | B1LYP                            | 41.78               | 0.45                | 41.64                 | 9.78                  | 51.42                 | 49.53                            | 34.65               | 0.85                | 34.83                 | 9.95                  | 44.78                 | 42.89 |
|            | B3LYP                            | 41.30               | 0.57                | 41.21                 | 9.88                  | 51.09                 | 49.20                            | 34.69               | 0.24                | 34.74                 | 8.21                  | 42.96                 | 41.07 |
| <b>TS2</b> | BPW91                            | 22.30               | 0.12                | 21.32                 | 10.84                 | 32.16                 | 30.27                            | 25.22               | -0.34               | 23.85                 | 10.41                 | 34.25                 | 32.36 |
|            | BLYP                             | 17.93               | -0.04               | 16.77                 | 10.75                 | 27.52                 | 25.63                            | 19.52               | -1.25               | 17.48                 | 9.72                  | 27.20                 | 25.31 |
|            | B1LYP                            | 25.90               | 0.32                | 25.15                 | 10.45                 | 35.60                 | 33.71                            | 26.13               | 0.72                | 25.69                 | 10.61                 | 36.31                 | 34.42 |
|            | B3LYP                            | 24.75               | 0.33                | 23.95                 | 10.59                 | 34.55                 | 32.66                            | 25.27               | -0.11               | 24.05                 | 10.46                 | 34.51                 | 32.62 |
| <b>TS3</b> | BPW91                            | 7.33                | -1.80               | 5.55                  | 12.17                 | 17.72                 | 15.83                            | 10.83               | -2.23               | 8.83                  | 11.48                 | 20.31                 | 18.42 |
|            | BLYP                             | 4.28                | -1.87               | 2.60                  | 11.53                 | 14.12                 | 12.23                            | 6.17                | -2.27               | 4.18                  | 11.26                 | 15.44                 | 13.55 |
|            | B1LYP                            | 10.02               | -2.36               | 7.97                  | 11.27                 | 19.24                 | 17.39                            | 11.44               | -1.94               | 9.69                  | 11.51                 | 21.20                 | 19.31 |
|            | B3LYP                            | 9.04                | -2.20               | 7.08                  | 11.45                 | 18.52                 | 16.63                            | 10.69               | -2.51               | 8.48                  | 11.09                 | 19.56                 | 17.67 |

<sup>a</sup>  $\Delta E^{\text{KS}\ddagger} = \sum(E_e^{\text{KS}})_{\text{TS Species}} - \sum(E_e^{\text{KS}})_{\text{Reactants}}$ ,  $\Delta G^\ddagger = \sum(E_e^{\text{KS}} + G_{\text{corr}})_{\text{TS Species}} - \sum(E_e^{\text{KS}} + G_{\text{corr}})_{\text{Reactants}}$

<sup>s</sup> Includes -1.89 kcal/mol correction to entropy and free energy to account for change in standard conditions in the gas phase to standard conditions in the solvated phase.

The computationally determined values of  $\Delta G^\ddagger$  reproduced the main trends of the experimental values and, at the same time, were somewhat higher than these. With the 6-311g\* basis set, the error was around 1-5 kcal mol<sup>-1</sup> for cacodylic acid catalyzed hydrolysis and 5-10 kcal mol<sup>-1</sup> for spontaneous hydrolysis. The error was slightly larger with the 6-311+g\* basis set, possibly because of the interaction of the extra diffuse orbitals with the implicit solvation model. In both cases, spontaneous and acid catalyzed, the BLYP/6-311g\* and BLYP/6-311+g\* functional/basis set combination (displayed in bold in Table ) produced the best agreement with experiment.

Table S3: Energies of **HB...BPDE** relative to those of non-interacting (+)-*anti*-BPDE and cacodylic acid in the solvent phase [kcal mol<sup>-1</sup>].

|       | 6-311g*         |            |            |              |            |              | 6-311+g*        |            |            |              |            |              |
|-------|-----------------|------------|------------|--------------|------------|--------------|-----------------|------------|------------|--------------|------------|--------------|
|       | $\Delta E^{KS}$ | $\Delta Z$ | $\Delta H$ | $-T\Delta S$ | $\Delta G$ | $\Delta G^s$ | $\Delta E^{KS}$ | $\Delta Z$ | $\Delta H$ | $-T\Delta S$ | $\Delta G$ | $\Delta G^s$ |
| BPW91 | -6.92           | 1.31       | -5.31      | 11.48        | 6.17       | 4.28         | -3.78           | 0.84       | -2.47      | 10.06        | 7.59       | 5.70         |
| BLYP  | -8.96           | 1.31       | -7.32      | 11.37        | 4.06       | 2.17         | -4.85           | 0.81       | -3.55      | 9.93         | 6.39       | 4.50         |
| B1LYP | -9.47           | 1.29       | -7.80      | 11.15        | 3.34       | 1.45         | -5.93           | 1.70       | -3.96      | 11.39        | 7.42       | 5.33         |
| B3LYP | -9.44           | 1.22       | -7.84      | 10.72        | 2.88       | 0.99         | -5.83           | 1.09       | -4.37      | 10.69        | 6.33       | 4.44         |

<sup>s</sup> Includes -1.89 kcal/mol correction to entropy and free energy to account for change in standard conditions in the gas phase to standard conditions in the solvated phase.

Table S4: Energies of **H<sub>2</sub>O...BPDE** relative to those of its non-interacting components in the solvent phase [kcal mol<sup>-1</sup>].

|       | 6-311g*         |            |            |              |            |              | 6-311+g*        |            |            |              |            |              |
|-------|-----------------|------------|------------|--------------|------------|--------------|-----------------|------------|------------|--------------|------------|--------------|
|       | $\Delta E^{KS}$ | $\Delta Z$ | $\Delta H$ | $-T\Delta S$ | $\Delta G$ | $\Delta G^s$ | $\Delta E^{KS}$ | $\Delta Z$ | $\Delta H$ | $-T\Delta S$ | $\Delta G$ | $\Delta G^s$ |
| BPW91 | -4.42           | 1.70       | -2.83      | 7.72         | 4.88       | 2.99         | -2.90           | 1.17       | -1.59      | 6.10         | 4.51       | 2.62         |
| B3LYP | -6.01           | 1.86       | -4.34      | 7.78         | 3.44       | 1.55         | -4.06           | 1.37       | -2.63      | 6.34         | 3.71       | 1.82         |

<sup>s</sup> Includes -1.89 kcal/mol correction to entropy and free energy to account for change in standard conditions in the gas phase to standard conditions in the solvated phase.

Table contains the computed energies of the hydrogen bonded **HB...BPDE** complex relative to its separate components (Fig. 4). The negative value of  $\Delta E^{KS}$  indicates that the hydrogen bond has the effect of lowering the electronic energy of the system.  $\Delta G$  is positive because the hydrogen bond also corresponds to a decrease in entropy of the entire complex, and thus the Gibbs free energy of the hydrogen bonded complex is between that of the separate components and the transition state. This result holds for both the gas phase and solvated calculations.

If the hydrogen bonded structure were at a Gibbs free energy lower than that corresponding to the sum of the individual reactants and if it forms before an chemical (as opposed to non-covalent) process takes place, this would correspond to an increase in the activation barrier. However, the decrease in enthalpy of the hydrogen bonded complex is more than compensated by a concomitant decrease in entropy.

When water acts as the proton donor, a hydrogen bonded structure can also be found (**H<sub>2</sub>O...BPDE**) where water is interacting with O3 (Fig. 3). Table contains the energies of the water/BPDE hydrogen bonded complex relative to the sum of those corresponding to its non-interacting components.

Table S5:  $\Delta G$  for BPDE hydrolysis [kcal mol<sup>-1</sup>].

|       | 6-311g*         |            |            |              |            | 6-311+g*        |            |            |              |            |
|-------|-----------------|------------|------------|--------------|------------|-----------------|------------|------------|--------------|------------|
|       | $\Delta E^{KS}$ | $\Delta Z$ | $\Delta H$ | $-T\Delta S$ | $\Delta G$ | $\Delta E^{KS}$ | $\Delta Z$ | $\Delta H$ | $-T\Delta S$ | $\Delta G$ |
| BPW91 | -18.09          | 3.70       | -15.38     | 10.64        | -4.74      | -14.36          | 3.43       | -11.80     | 10.27        | -1.53      |
| BLYP  | -19.36          | 3.79       | -16.57     | 10.61        | -5.96      | -14.71          | 3.55       | -12.06     | 10.40        | -1.66      |
| B1LYP | -22.63          | 3.90       | -19.72     | 10.60        | -9.12      | -18.82          | 3.67       | -16.05     | 10.36        | -5.69      |
| B3LYP | -22.34          | 3.92       | -19.45     | 10.62        | -8.82      | -18.31          | 3.73       | -15.53     | 10.44        | -5.09      |

Table S6: Energies for BPDE-Cacodylic acid hydrogen bonded structure HB...BPDE [Hartrees].

|       | $E^{KS}$     | Z        | Hcorr    | Gcorr    | $E^{KS}$     | Z        | Hcorr    | Gcorr    |
|-------|--------------|----------|----------|----------|--------------|----------|----------|----------|
| BPW91 | -3463.284512 | 0.372636 | 0.400244 | 0.315383 | -3463.310438 | 0.371251 | 0.399261 | 0.312014 |
| BLYP  | -3462.855784 | 0.370282 | 0.398040 | 0.312854 | -3462.886833 | 0.368927 | 0.397116 | 0.309399 |
| B1LYP | -3462.651524 | 0.385137 | 0.411950 | 0.328501 | -3462.678735 | 0.384032 | 0.411112 | 0.326260 |
| B3LYP | -3463.280469 | 0.382855 | 0.409868 | 0.325415 | -3463.307736 | 0.381941 | 0.409129 | 0.324216 |

Table S7: Energies for (+)-*anti*-BPDE [Hartrees].

|       | $E^{KS}$    | Z        | Hcorr    | Gcorr    | $E^{KS}$    | Z        | Hcorr    | Gcorr    |
|-------|-------------|----------|----------|----------|-------------|----------|----------|----------|
| BPW91 | -996.337613 | 0.281862 | 0.299739 | 0.238315 | -996.356405 | 0.281307 | 0.299311 | 0.237736 |
| BLYP  | -996.090562 | 0.279969 | 0.297887 | 0.236482 | -996.113028 | 0.279548 | 0.297606 | 0.235946 |
| B1LYP | -995.959720 | 0.291546 | 0.308741 | 0.248693 | -995.979432 | 0.291016 | 0.308351 | 0.248034 |
| B3LYP | -996.449192 | 0.289861 | 0.307206 | 0.246959 | -996.469152 | 0.289271 | 0.306777 | 0.246149 |

Table S8: Energies for H<sub>2</sub>O [Hartrees].

|       | $E^{KS}$   | Z        | Hcorr    | Gcorr    | $E^{KS}$   | Z        | Hcorr    | Gcorr    |
|-------|------------|----------|----------|----------|------------|----------|----------|----------|
| BPW91 | -76.433735 | 0.020784 | 0.024563 | 0.003114 | -76.444243 | 0.020672 | 0.024451 | 0.003002 |
| BLYP  | -76.423750 | 0.020546 | 0.024325 | 0.002865 | -76.436796 | 0.020442 | 0.024221 | 0.002762 |
| B1LYP | -76.411126 | 0.021426 | 0.025205 | 0.003785 | -76.421795 | 0.021315 | 0.025094 | 0.003674 |
| B3LYP | -76.442572 | 0.021308 | 0.025087 | 0.003663 | -76.453316 | 0.021194 | 0.024973 | 0.003548 |

Table S9: Energies for Cacodylic acid [Hartrees].

|       | $E^{KS}$     | Z        | Hcorr    | Gcorr    | $E^{KS}$     | Z        | Hcorr    | Gcorr    |
|-------|--------------|----------|----------|----------|--------------|----------|----------|----------|
| BPW91 | -2466.935873 | 0.088684 | 0.097943 | 0.056207 | -2466.948013 | 0.088605 | 0.097867 | 0.056165 |
| BLYP  | -996.090562  | 0.279969 | 0.297887 | 0.236482 | -996.113028  | 0.279548 | 0.297606 | 0.235946 |
| B1LYP | -2466.676721 | 0.091543 | 0.100562 | 0.059397 | -2466.689855 | 0.091407 | 0.100468 | 0.059192 |
| B3LYP | -2466.816236 | 0.091045 | 0.100113 | 0.058824 | -2466.829297 | 0.090938 | 0.100026 | 0.058698 |

Table S10: Energies for (7R,8S,9R,10S)-BPT (tetrol) [Hartrees].

|       | $E^{KS}$     | Z        | Hcorr    | Gcorr    | $E^{KS}$     | Z        | Hcorr    | Gcorr    |
|-------|--------------|----------|----------|----------|--------------|----------|----------|----------|
| BPW91 | -1072.800177 | 0.308548 | 0.328628 | 0.262703 | -1072.823533 | 0.307444 | 0.327839 | 0.261185 |
| BLYP  | -1072.545171 | 0.306560 | 0.326671 | 0.260714 | -1072.573262 | 0.305650 | 0.326044 | 0.259498 |
| B1LYP | -1072.406913 | 0.319189 | 0.338586 | 0.274015 | -1072.431223 | 0.318186 | 0.337856 | 0.272631 |
| B3LYP | -1072.927368 | 0.317418 | 0.336907 | 0.272164 | -1072.951644 | 0.316410 | 0.336178 | 0.270764 |

Table S11: Energies for transition states [Hartrees].

|            |       | $E^{\text{KS}}$ | Z        | Hcorr    | Gcorr    | $E^{\text{KS}}$ | Z        | Hcorr    | Gcorr    |
|------------|-------|-----------------|----------|----------|----------|-----------------|----------|----------|----------|
| <b>TS1</b> | BPW91 | -1072.704756    | 0.302550 | 0.323642 | 0.255085 | -1072.742406    | 0.302020 | 0.323584 | 0.253484 |
|            | BLYP  | -1072.458345    | 0.301620 | 0.322416 | 0.254886 | -1072.503892    | 0.300159 | 0.321766 | 0.252128 |
|            | B1LYP | -1072.304272    | 0.313686 | 0.333734 | 0.267854 | -1072.346009    | 0.312646 | 0.333532 | 0.264712 |
|            | B3LYP | -1072.825945    | 0.312073 | 0.332147 | 0.266216 | -1072.867183    | 0.310855 | 0.331831 | 0.262866 |
| <b>TS2</b> | BPW91 | -1072.735803    | 0.302844 | 0.322736 | 0.257132 | -1072.760460    | 0.301437 | 0.321574 | 0.255135 |
|            | BLYP  | -1072.485746    | 0.300455 | 0.320370 | 0.254631 | -1072.518721    | 0.297999 | 0.318575 | 0.250948 |
|            | B1LYP | -1072.329565    | 0.313485 | 0.332753 | 0.267931 | -1072.359592    | 0.312646 | 0.333532 | 0.264712 |
|            | B3LYP | -1072.852325    | 0.311690 | 0.331023 | 0.266234 | -1072.88220     | 0.310287 | 0.329808 | 0.264420 |
| <b>TS3</b> | BPW91 | -3463.261806    | 0.367683 | 0.394851 | 0.311078 | -3463.287157    | 0.366351 | 0.393984 | 0.309007 |
|            | BLYP  | -3462.834697    | 0.365210 | 0.392753 | 0.307809 | -3462.869274    | 0.364025 | 0.391870 | 0.306263 |
|            | B1LYP | -3462.620479    | 0.379336 | 0.406040 | 0.322785 | -3462.651061    | 0.378173 | 0.405146 | 0.320742 |
|            | B3LYP | -3463.251015    | 0.377400 | 0.404180 | 0.320889 | -3463.281408    | 0.376212 | 0.403270 | 0.318983 |

Table S12: Mulliken and NBO charges for (+)-*anti*-BPDE, **TS1** (Triol), and (7R,8S,9R,10S)-BPT (Tetrol).

|                   | 6-311g*  |            |        |       |            |        | 6-31+g*  |            |        |       |            |        |
|-------------------|----------|------------|--------|-------|------------|--------|----------|------------|--------|-------|------------|--------|
|                   | Mulliken |            |        | NBO   |            |        | Mulliken |            |        | NBO   |            |        |
| B1LYP             | BPDE     | Transition | Tetrol | BPDE  | Transition | Tetrol | BPDE     | Transition | Tetrol | BPDE  | Transition | Tetrol |
| C9                | -0.07    | -0.11      | +0.04  | +0.09 | +0.07      | +0.12  | -0.09    | -0.44      | +0.08  | +0.04 | +0.01      | +0.05  |
| C9,H              | +0.17    | +0.13      | +0.26  | +0.29 | +0.27      | +0.30  | +0.14    | -0.21      | +0.29  | +0.29 | +0.26      | +0.28  |
| C10               | -0.23    | -0.10      | -0.10  | +0.09 | +0.02      | +0.12  | -0.72    | -0.74      | -1.30  | +0.04 | -0.01      | +0.05  |
| C10,H             | +0.02    | +0.15      | +0.14  | +0.29 | +0.30      | +0.31  | -0.51    | -0.39      | -1.08  | +0.30 | +0.30      | +0.30  |
| O3                | -0.33    | -0.61      | -0.62  | -0.57 | -0.75      | -0.76  | -0.40    | -0.76      | -0.73  | -0.58 | -0.79      | -0.80  |
| O4,H              | NA       | -0.63      | NA     | NA    | -0.83      | NA     | NA       | -0.90      | NA     | NA    | -0.93      | NA     |
| BPDE/Triol/Tetrol | 0.00     | +0.63      | 0.00   | 0.00  | +0.83      | 0.00   | 0.00     | +0.90      | 0.00   | 0.00  | +0.93      | 0.00   |
| Total             | 0.00     | 0.00       | 0.00   | 0.00  | 0.00       | 0.00   | 0.00     | 0.00       | 0.00   | 0.00  | 0.00       | 0.00   |
| B3LYP             | BPDE     | Transition | Tetrol | BPDE  | Transition | Tetrol | BPDE     | Transition | Tetrol | BPDE  | Transition | Tetrol |
| C9                | -0.07    | -0.12      | +0.04  | +0.09 | +0.07      | +0.12  | -0.09    | -0.43      | +0.07  | +0.04 | 0.00       | +0.04  |
| C9,H              | +0.17    | +0.12      | +0.26  | +0.29 | +0.27      | +0.30  | +0.13    | -0.21      | +0.27  | +0.29 | +0.26      | +0.28  |
| C10               | -0.23    | -0.10      | -0.11  | +0.09 | +0.01      | +0.11  | -0.71    | -0.79      | -1.30  | +0.04 | -0.02      | +0.04  |
| C10,H             | +0.02    | +0.14      | +0.13  | +0.29 | +0.28      | +0.31  | -0.50    | -0.44      | -1.08  | +0.29 | +0.29      | +0.30  |
| O3                | -0.33    | -0.60      | -0.62  | -0.57 | -0.75      | -0.76  | -0.39    | -0.75      | -0.72  | -0.58 | -0.78      | -0.80  |
| O4,H              | NA       | -0.61      | NA     | NA    | -0.81      | NA     | NA       | -0.89      | NA     | NA    | -0.91      | NA     |
| BPDE/Triol/Tetrol | 0.00     | +0.61      | 0.00   | 0.00  | +0.81      | 0.00   | 0.00     | +0.89      | 0.00   | 0.00  | +0.91      | 0.00   |
| Total             | 0.00     | 0.00       | 0.00   | 0.00  | 0.00       | 0.00   | 0.00     | 0.00       | 0.00   | 0.00  | 0.00       | 0.00   |

Table S13: Mulliken and NBO charges for (+)-*anti*-BPDE, **TS2**, and (7R,8S,9R,10S)-BPT (Tetrol).

|                  | 6-311g*  |            |        |       |            |        | 6-31+g*  |            |        |       |            |        |
|------------------|----------|------------|--------|-------|------------|--------|----------|------------|--------|-------|------------|--------|
|                  | Mulliken |            |        | NBO   |            |        | Mulliken |            |        | NBO   |            |        |
| B1LYP            | BPDE     | Transition | Tetrol | BPDE  | Transition | Tetrol | BPDE     | Transition | Tetrol | BPDE  | Transition | Tetrol |
| C9               | -0.07    | +0.03      | +0.04  | +0.09 | +0.09      | +0.12  | -0.09    | -0.17      | +0.08  | +0.04 | +0.08      | +0.05  |
| C9,H             | +0.17    | +0.2-      | +0.26  | +0.29 | +0.23      | +0.30  | +0.14    | -0.01      | +0.29  | +0.29 | +0.28      | +0.28  |
| C10              | -0.23    | -0.30      | -0.10  | +0.09 | +0.15      | +0.12  | -0.72    | -1.21      | -1.30  | +0.04 | +0.05      | +0.05  |
| C10,H            | +0.02    | -0.04      | +0.14  | +0.29 | +0.35      | +0.31  | -0.51    | -0.97      | -1.08  | +0.30 | +0.31      | +0.30  |
| O3               | -0.33    | -0.67      | -0.62  | -0.57 | -0.91      | -0.76  | -0.40    | -0.82      | -0.73  | -0.58 | -0.93      | -0.80  |
| H+               | NA       | +0.43      | NA     | NA    | +0.47      | NA     | NA       | +0.57      | NA     | NA    | +0.53      | NA     |
| H <sub>2</sub> O | NA       | +0.01      | NA     | NA    | +0.03      | NA     | NA       | +0.06      | NA     | NA    | +0.04      | NA     |
| BPDE/TS2/Tetrol  | 0.00     | -0.01      | 0.00   | 0.00  | -0.03      | 0.00   | 0.00     | -0.06      | 0.00   | 0.00  | -0.04      | 0.00   |
| Total            | 0.00     | 0.00       | 0.00   | 0.00  | 0.00       | 0.00   | 0.00     | 0.00       | 0.00   | 0.00  | 0.00       | 0.00   |
| B3LYP            | BPDE     | Transition | Tetrol | BPDE  | Transition | Tetrol | BPDE     | Transition | Tetrol | BPDE  | Transition | Tetrol |
| C9               | -0.07    | +0.02      | +0.04  | +0.09 | +0.08      | +0.12  | -0.09    | -0.19      | +0.07  | +0.04 | +0.02      | +0.04  |
| C9,H             | +0.17    | +0.19      | +0.26  | +0.29 | +0.23      | +0.30  | +0.13    | -0.03      | +0.27  | +0.29 | +0.23      | +0.28  |
| C10              | -0.23    | -0.31      | -0.11  | +0.09 | +0.13      | +0.11  | -0.71    | -1.20      | -1.30  | +0.04 | +0.07      | +0.04  |
| C10,H            | +0.02    | -0.05      | +0.13  | +0.29 | +0.34      | +0.31  | -0.50    | -0.97      | -1.08  | +0.29 | +0.33      | +0.3   |
| O3               | -0.33    | -0.66      | -0.62  | -0.57 | -0.89      | -0.76  | -0.39    | -0.80      | -0.72  | -0.58 | -0.92      | -0.8   |
| H+               | NA       | +0.43      | NA     | NA    | +0.47      | NA     | NA       | +0.56      | NA     | NA    | +0.52      | NA     |
| H <sub>2</sub> O | NA       | +0.01      | NA     | NA    | +0.03      | NA     | NA       | +0.05      | NA     | NA    | +0.03      | NA     |
| BPDE/TS2/Tetrol  | 0.00     | -0.01      | 0.00   | 0.00  | -0.03      | 0.00   | 0.00     | -0.05      | 0.00   | 0.00  | -0.03      | 0.00   |
| Total            | 0.00     | 0.00       | 0.00   | 0.00  | 0.00       | 0.00   | 0.00     | 0.00       | 0.00   | 0.00  | 0.00       | 0.00   |

Table S14: Mulliken and NBO charges for (+)-*anti*-BPDE , **TS3**, and (7R,8S,9R,10S)-BPT (Tetrol).

| 6-311g* | 6-311g*  |            |        |       |            |        | 6-31+g* |            |        |          |            |        |       |            |        |
|---------|----------|------------|--------|-------|------------|--------|---------|------------|--------|----------|------------|--------|-------|------------|--------|
|         | Mulliken |            |        | NBO   |            |        | 6-31+g* |            |        | Mulliken |            |        | NBO   |            |        |
| B1LYP   | BPDE     | Transition | Tetrol | BPDE  | Transition | Tetrol | BPDE    | Transition | Tetrol | BPDE     | Transition | Tetrol | BPDE  | Transition | Tetrol |
| C9      | -0.07    | -0.09      | +0.04  | +0.09 | +0.07      | +0.12  | -0.09   | -0.11      | +0.08  | +0.04    | +0.00      | +0.05  | +0.04 | +0.00      | +0.05  |
| C9,H    | +0.17    | +0.13      | +0.26  | +0.29 | +0.25      | +0.30  | +0.14   | +0.09      | +0.29  | +0.29    | +0.23      | +0.28  | +0.29 | +0.23      | +0.28  |
| C10     | -0.23    | -0.17      | -0.10  | +0.09 | +0.11      | +0.12  | -0.72   | -0.37      | -1.30  | +0.04    | +0.03      | +0.05  | +0.04 | +0.03      | +0.05  |
| C10,H   | +0.02    | +0.15      | +0.14  | +0.29 | +0.36      | +0.31  | -0.51   | -0.08      | -1.08  | +0.30    | +0.31      | +0.3   | +0.30 | +0.31      | +0.3   |
| O3      | -0.33    | -0.57      | -0.62  | -0.57 | -0.74      | -0.76  | -0.40   | -0.74      | -0.73  | -0.58    | -0.81      | -0.8   | -0.58 | -0.81      | -0.8   |
| H+      | NA       | +0.44      | NA     | NA    | +0.49      | NA     | NA      | +0.61      | NA     | NA       | +0.53      | NA     | NA    | +0.53      | NA     |
| O4      | NA       | -0.82      | NA     | NA    | -1.13      | NA     | NA      | -0.88      | NA     | NA       | +0.04      | NA     | NA    | +0.04      | NA     |
| As      | NA       | +1.23      | NA     | NA    | +2.09      | NA     | NA      | +1.16      | NA     | NA       | +0.62      | NA     | NA    | +0.62      | NA     |
| Total   | 0.00     | 0.00       | 0.00   | 0.00  | 0.00       | 0.00   | 0.00    | 0.00       | 0.00   | 0.00     | 0.00       | 0.00   | 0.00  | 0.00       | 0.00   |
| B3LYP   | BPDE     | Transition | Tetrol | BPDE  | Transition | Tetrol | BPDE    | Transition | Tetrol | BPDE     | Transition | Tetrol | BPDE  | Transition | Tetrol |
| C9      | -0.07    | -0.10      | +0.04  | +0.09 | +0.06      | +0.12  | -0.09   | -0.10      | +0.07  | +0.04    | 0          | +0.04  | +0.04 | 0          | +0.04  |
| C9,H    | +0.17    | +0.12      | +0.26  | +0.29 | +0.25      | +0.30  | +0.13   | +0.10      | +0.27  | +0.29    | +0.23      | +0.28  | +0.29 | +0.23      | +0.28  |
| C10     | -0.23    | -0.17      | -0.11  | +0.09 | +0.09      | +0.11  | -0.71   | -0.38      | -1.30  | +0.04    | +0.02      | +0.04  | +0.04 | +0.02      | +0.04  |
| C10,H   | +0.02    | +0.14      | +0.13  | +0.29 | +0.35      | +0.31  | -0.50   | -0.10      | -1.08  | +0.29    | +0.30      | +0.30  | +0.29 | +0.30      | +0.30  |
| O3      | -0.33    | -0.56      | -0.62  | -0.57 | -0.72      | -0.76  | -0.39   | -0.72      | -0.72  | -0.58    | -0.79      | -0.80  | -0.58 | -0.79      | -0.80  |
| H+      | NA       | +0.43      | NA     | NA    | +0.49      | NA     | NA      | +0.60      | NA     | NA       | +0.53      | NA     | NA    | +0.53      | NA     |
| O4      | NA       | -0.81      | NA     | NA    | -1.12      | NA     | NA      | -0.87      | NA     | NA       | -0.02      | NA     | NA    | -0.02      | NA     |
| As      | NA       | +1.20      | NA     | NA    | +2.08      | NA     | NA      | +1.14      | NA     | NA       | +0.61      | NA     | NA    | +0.61      | NA     |
| Total   | 0.00     | 0.00       | 0.00   | 0.00  | 0.00       | 0.00   | 0.00    | 0.00       | 0.00   | 0.00     | 0.00       | 0.00   | 0.00  | 0.00       | 0.00   |

**Structural information.** Angles  $\phi_{1-4}$  are the dihedrals that the hydroxyl groups make with respect to the six membered ring to which they are attached. Dihedral angles are reported in the range -180 to 180. Hydroxyl are numbered starting at the bottom in counterclockwise order. The atoms involved in the dihedral angles ( $\phi$ ) are given below. Fig. S1 displays relevant atom labels.

$$\begin{aligned} \phi_1 &: C'' - C' - C7 - O1 \\ \phi_2 &: C' - C7 - C8 - O2 \\ \phi_3 &: C'' - C10 - C9 - O3 \\ \phi_4 &: C' - C'' - C10 - O4 \end{aligned} \tag{2}$$

$$\tag{3}$$

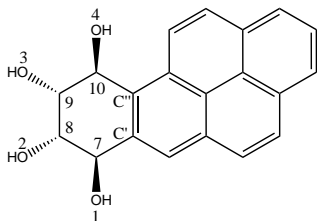

Figure S1: Scheme illustrating labeling convention. Note that only the tetrol has a bound O4 oxygen. For the transition structures, O4 refers to the oxygen that donates a proton to BPDE (either from a water molecule or cacodylic acid). O4 is not present in BPDE by itself.

Table S15: Selected **TS1** geometric parameters. Distances given in Å and angles in degrees.

| 6-311g*  | $\phi_1$ | $\phi_2$ | $\phi_3$ | $\phi_4$ | C9-C10 | C10-O3 | C9-O3 | C10-O4 | O4-C10-C9 | C10-O4-H |
|----------|----------|----------|----------|----------|--------|--------|-------|--------|-----------|----------|
| BPW91    | -162.769 | 179.019  | -101.589 | 170.284  | 1.503  | 2.407  | 1.459 | 2.773  | 110.278   | 146.493  |
| BLYP     | -162.398 | 179.502  | -93.784  | -176.879 | 1.509  | 2.429  | 1.472 | 2.992  | 114.644   | 82.827   |
| B1LYP    | 164.868  | 179.603  | -98.630  | -161.442 | 1.502  | 2.376  | 1.441 | 2.843  | 111.667   | 95.816   |
| B3LYP    | -164.529 | 179.709  | -96.572  | -164.047 | 1.502  | 2.385  | 1.443 | 2.867  | 112.677   | 92.988   |
| 6-311+g* | $\phi_1$ | $\phi_2$ | $\phi_3$ | $\phi_4$ | C9-C10 | C10-O3 | C9-O3 | C10-O4 | O4-C10-C9 | C10-O4-H |
| BPW91    | -161.897 | 179.532  | -99.477  | 175.319  | 1.504  | 2.409  | 1.458 | 2.937  | 112.519   | 150.233  |
| BLYP     | -162.674 | 179.600  | -93.004  | -161.538 | 15.08  | 2.428  | 1.471 | 2.928  | 110.457   | 117.551  |
| B1LYP    | -164.698 | 179.862  | -101.977 | -160.965 | 1.507  | 2.378  | 1.439 | 2.871  | 106.551   | 149.953  |
| B3LYP    | -164.827 | 179.767  | -101.181 | -160.511 | 1.500  | 2.376  | 1.442 | 2.861  | 107.016   | 149.070  |



Table S16: Selected **TS2** geometric parameters. Distances given in Å and angles in degrees.

| 6-311g*  | $\phi_1$ | $\phi_2$ | $\phi_3$ | $\phi_4$ | C9-C10 | C10-O3 | C9-O3 | C10-O4 | O4-C10-C9 |
|----------|----------|----------|----------|----------|--------|--------|-------|--------|-----------|
| BPW91    | -161.034 | -178.101 | -80.157  | -117.449 | 1.517  | 2.354  | 1.384 | 2.354  | 92.690    |
| BLYP     | -159.751 | -178.295 | -82.025  | -115.972 | 1.531  | 2.384  | 1.394 | 2.295  | 92.926    |
| B1LYP    | -158.553 | -177.567 | -83.442  | -114.697 | 1.530  | 2.371  | 1.374 | 2.281  | 93.289    |
| B3LYP    | -159.055 | -177.765 | -82.655  | -115.550 | 1.526  | 2.365  | 1.376 | 2.294  | 93.160    |
| 6-311+g* | $\phi_1$ | $\phi_2$ | $\phi_3$ | $\phi_4$ | C9-C10 | C10-O3 | C9-O3 | C10-O4 | O4-C10-C9 |
| BPW91    | -159.745 | -177.189 | -85.172  | -112.363 | 1.524  | 2.381  | 1.382 | 2.332  | 93.304    |
| BLYP     | -159.751 | -178.295 | -82.025  | -115.972 | 1.531  | 2.384  | 1.394 | 2.295  | 92.926    |
| B1LYP    | -157.631 | -176.288 | -91.659  | -108.138 | 1.539  | 2.408  | 1.383 | 2.215  | 94.203    |
| B3LYP    | -158.049 | -176.352 | -90.940  | -108.560 | 1.536  | 2.398  | 1.384 | 2.240  | 94.014    |

Table S17: Selected **TS3** geometric parameters. Distances given in Å and angles in degrees.

| 6-311g*  | $\phi_1$ | $\phi_2$ | $\phi_3$ | $\phi_4$ | C9-C10 | C10-O3 | C9-O3 | C10-O4 | O4-C10-C9 | C10-As |
|----------|----------|----------|----------|----------|--------|--------|-------|--------|-----------|--------|
| BPW91    | -168.258 | 175.424  | -96.733  | -96.676  | 1.493  | 2.226  | 1.427 | 3.592  | 62.003    | 3.877  |
| BLYP     | -163.233 | 176.348  | -93.928  | -97.057  | 1.496  | 2.141  | 1.435 | 3.586  | 62.679    | 3.918  |
| B1LYP    | -162.478 | 175.990  | -94.134  | -96.894  | 1.483  | 2.086  | 1.412 | 3.542  | 62.979    | 3.884  |
| B3LYP    | -162.688 | 176.053  | -94.134  | -97.233  | 1.483  | 2.087  | 1.414 | 3.537  | 63.202    | 3.879  |
| 6-311+g* | $\phi_1$ | $\phi_2$ | $\phi_3$ | $\phi_4$ | C9-C10 | C10-O3 | C9-O3 | C10-O4 | O4-C10-C9 | C10-As |
| BPW91    | -163.381 | 176.856  | -94.589  | -97.475  | 1.489  | 2.171  | 1.426 | 3.595  | 63.672    | 3.954  |
| BLYP     | -162.289 | 176.563  | -94.913  | -96.247  | 1.498  | 2.173  | 1.431 | 3.659  | 62.602    | 4.026  |
| B1LYP    | -161.913 | 177.255  | -94.954  | -95.799  | 1.489  | 2.157  | 1.406 | 3.622  | 62.339    | 3.977  |
| B3LYP    | -162.159 | 177.051  | -94.888  | -96.351  | 1.488  | 2.146  | 1.408 | 3.610  | 62.759    | 3.968  |

Table S18: Selected (+)-*anti*-BPDE geometric parameters. Distances given in Å and angles in degrees.

| 6-311g*  | $\phi_1$ | $\phi_2$ | $\phi_3$ | C9-C10 | C10-O3 | C9-O3 |
|----------|----------|----------|----------|--------|--------|-------|
| BPW91    | -162.462 | 177.718  | -106.133 | 1.469  | 1.468  | 1.450 |
| BLYP     | -161.802 | 176.822  | -106.025 | 1.462  | 1.485  | 1.462 |
| B1LYP    | -161.524 | 176.344  | -105.966 | 1.469  | 1.454  | 1.439 |
| B3LYP    | -161.652 | 176.533  | -106.015 | 1.470  | 1.456  | 1.440 |
| 6-311+g* | $\phi_1$ | $\phi_2$ | $\phi_3$ | C9-C10 | C10-O3 | C9-O3 |
| BPW91    | -161.602 | 176.005  | -106.111 | 1.472  | 1.472  | 1.512 |
| BLYP     | -160.584 | 174.697  | -105.957 | 1.491  | 1.491  | 1.464 |
| B1LYP    | -160.683 | 174.782  | -105.951 | 1.440  | 1.458  | 1.440 |
| B3LYP    | -160.804 | 174.929  | -105.993 | 1.460  | 1.460  | 1.441 |

Table S19: Selected (7R,8S,9R,10S)-BPT (Tetrol) geometric parameters. Distances given in Å and angles in degrees.

| 6-311g*  | $\phi_1$ | $\phi_2$ | $\phi_3$ | $\phi_4$ | C9-C10 | C10-O3 | C9-O3 | C10-O4 | O4-C10-C9 |
|----------|----------|----------|----------|----------|--------|--------|-------|--------|-----------|
| BPW91    | -149.524 | 170.982  | -81.529  | 111.275  | 1.538  | 2.410  | 1.434 | 1.448  | 109.766   |
| BLYP     | -148.611 | 170.434  | -81.942  | 111.599  | 1.545  | 2.421  | 1.446 | 1.461  | 109.467   |
| B1LYP    | -147.853 | 170.857  | -80.857  | 111.222  | 1.532  | 2.393  | 1.426 | 1.438  | 109.628   |
| B3LYP    | -148.151 | 170.884  | -81.042  | 111.310  | 1.533  | 2.395  | 1.427 | 1.439  | 109.642   |
| 6-311+g* | $\phi_1$ | $\phi_2$ | $\phi_3$ | $\phi_4$ | C9-C10 | C10-O3 | C9-O3 | C10-O4 | O4-C10-C9 |
| BPW91    | -147.100 | 169.175  | -79.147  | 107.564  | 1.537  | 2.404  | 1.437 | 1.452  | 109.613   |
| BLYP     | -145.355 | 154.481  | -78.981  | 107.072  | 1.544  | 2.415  | 1.450 | 1.467  | 109.260   |
| B1LYP    | -145.704 | 169.183  | -78.750  | 107.876  | 1.532  | 2.389  | 1.428 | 1.441  | 109.442   |
| B3LYP    | -145.970 | 155.240  | -78.844  | 107.866  | 1.532  | 2.391  | 1.429 | 1.442  | 109.453   |

Table S20: As-C10 distances for hydrogen bonded (**HB...BPDE**) and **TS3** structures.

|       | 6-311g*          |            | 6-311+g*         |            |
|-------|------------------|------------|------------------|------------|
|       | <b>HB...BPDE</b> | <b>TS3</b> | <b>HB...BPDE</b> | <b>TS3</b> |
| BPW91 | 3.985            | 3.877      | 4.071            | 3.954      |
| BLYP  | 4.018            | 3.918      | 4.128            | 4.026      |
| B1LYP | 3.991            | 3.884      | 4.073            | 3.977      |
| B3LYP | 4.005            | 3.879      | 4.071            | 3.968      |

Table S21: BPW91 6-311g\* **TS1** coordinates (Å).

| Atom | x         | y         | z         |
|------|-----------|-----------|-----------|
| C    | -1.916179 | 0.807790  | 0.125517  |
| C    | -0.921177 | 1.716607  | -0.152883 |
| C    | 0.439217  | 1.277392  | -0.403596 |
| C    | 0.721059  | -0.157246 | -0.421019 |
| C    | 2.029027  | -0.666781 | -0.670956 |
| C    | 2.262788  | -2.027226 | -0.676767 |
| C    | 1.222765  | -2.972686 | -0.425532 |
| C    | 1.448664  | -4.370483 | -0.427361 |
| C    | 0.409506  | -5.263612 | -0.160255 |
| C    | -0.877636 | -4.788220 | 0.115002  |
| C    | -1.149738 | -3.402567 | 0.128042  |
| C    | -2.454284 | -2.886436 | 0.409228  |
| C    | -2.698602 | -1.530505 | 0.415702  |
| C    | -1.660474 | -0.592952 | 0.142545  |
| C    | -0.337481 | -1.074681 | -0.142449 |
| C    | -0.089577 | -2.480265 | -0.147675 |
| C    | 1.456378  | 2.206292  | -0.593047 |
| C    | 1.236520  | 3.685830  | -0.444312 |
| C    | -0.060958 | 4.033011  | 0.283669  |
| C    | -1.218441 | 3.187656  | -0.281784 |
| O    | 1.113360  | 4.276642  | -1.772314 |
| O    | -0.367615 | 5.423558  | 0.174942  |
| O    | -2.445890 | 3.521196  | 0.359264  |
| H    | -2.928642 | 1.165502  | 0.316098  |
| H    | 2.864882  | 0.032618  | -0.840627 |
| H    | 3.271867  | -2.399801 | -0.871016 |
| H    | 2.451884  | -4.746078 | -0.639848 |
| H    | 0.600975  | -6.337810 | -0.165579 |
| H    | -1.687280 | -5.491217 | 0.322495  |
| H    | -3.263060 | -3.588910 | 0.621632  |
| H    | -3.701173 | -1.155476 | 0.630930  |
| H    | 2.497083  | 1.896858  | -0.816020 |
| H    | 2.095643  | 4.139815  | 0.075025  |
| H    | 0.041115  | 3.813731  | 1.357178  |
| H    | -1.286360 | 3.417010  | -1.365781 |
| H    | -0.113940 | 5.670399  | -0.738111 |
| H    | -2.477516 | 4.496809  | 0.346407  |
| H    | 4.883090  | 1.028846  | -0.459933 |
| O    | 4.169444  | 1.644588  | -0.707940 |
| H    | 2.009735  | 4.401714  | -2.128387 |

Table S22: BPW91 6-311+g\* **TS1** coordinates (Å).

| Atom | x         | y         | z         |
|------|-----------|-----------|-----------|
| C    | -1.919964 | 0.810197  | 0.118197  |
| C    | -0.927194 | 1.719413  | -0.155458 |
| C    | 0.439511  | 1.279244  | -0.392963 |
| C    | 0.721507  | -0.160493 | -0.412174 |
| C    | 2.024925  | -0.671404 | -0.662852 |
| C    | 2.257408  | -2.034509 | -0.666191 |
| C    | 1.216545  | -2.976322 | -0.416200 |
| C    | 1.440485  | -4.375659 | -0.416487 |
| C    | 0.398925  | -5.267436 | -0.154540 |
| C    | -0.888649 | -4.788349 | 0.114283  |
| C    | -1.157503 | -3.401287 | 0.125148  |
| C    | -2.461437 | -2.884087 | 0.399567  |
| C    | -2.704253 | -1.525981 | 0.404516  |
| C    | -1.662977 | -0.593015 | 0.137012  |
| C    | -0.339953 | -1.076278 | -0.140402 |
| C    | -0.095039 | -2.481518 | -0.145076 |
| C    | 1.454321  | 2.206806  | -0.557450 |
| C    | 1.227078  | 3.689490  | -0.443321 |
| C    | -0.071128 | 4.039252  | 0.285506  |
| C    | -1.229773 | 3.191230  | -0.275015 |
| O    | 1.104435  | 4.250618  | -1.783084 |
| O    | -0.373456 | 5.431305  | 0.182038  |
| O    | -2.459940 | 3.505029  | 0.376820  |
| H    | -2.934603 | 1.163394  | 0.304406  |
| H    | 2.867935  | 0.017605  | -0.834436 |
| H    | 3.266515  | -2.406877 | -0.860796 |
| H    | 2.444194  | -4.752750 | -0.624337 |
| H    | 0.588276  | -6.341961 | -0.158633 |
| H    | -1.700994 | -5.489370 | 0.318351  |
| H    | -3.273014 | -3.584694 | 0.607726  |
| H    | -3.707528 | -1.149890 | 0.614066  |
| H    | 2.498302  | 1.900419  | -0.743867 |
| H    | 2.081621  | 4.160360  | 0.067109  |
| H    | 0.039194  | 3.824118  | 1.358707  |
| H    | -1.317245 | 3.424714  | -1.355774 |
| H    | -0.149609 | 5.693761  | -0.734643 |
| H    | -2.533997 | 4.478395  | 0.355455  |
| H    | 5.113450  | 1.130862  | -0.490362 |
| O    | 4.295419  | 1.523052  | -0.849107 |
| H    | 1.997190  | 4.433528  | -2.125256 |

Table S23: BLYP 6-311g\* **TS1** coordinates (Å).

| Atom | x         | y         | z         |
|------|-----------|-----------|-----------|
| C    | -1.894233 | 0.818028  | 0.112894  |
| C    | -0.900967 | 1.726567  | -0.168176 |
| C    | 0.479365  | 1.288224  | -0.381624 |
| C    | 0.752748  | -0.161993 | -0.432637 |
| C    | 2.045634  | -0.688310 | -0.731664 |
| C    | 2.267564  | -2.055108 | -0.751371 |
| C    | 1.232503  | -2.994477 | -0.452224 |
| C    | 1.449912  | -4.398697 | -0.449671 |
| C    | 0.406682  | -5.285853 | -0.165483 |
| C    | -0.876440 | -4.799333 | 0.126549  |
| C    | -1.141620 | -3.408049 | 0.133979  |
| C    | -2.442271 | -2.881944 | 0.428551  |
| C    | -2.679435 | -1.520706 | 0.432059  |
| C    | -1.639355 | -0.588947 | 0.137757  |
| C    | -0.317395 | -1.077954 | -0.163660 |
| C    | -0.076673 | -2.489723 | -0.161352 |
| C    | 1.503561  | 2.220721  | -0.446852 |
| C    | 1.258296  | 3.708213  | -0.386040 |
| C    | -0.069102 | 4.066328  | 0.298949  |
| C    | -1.208504 | 3.202771  | -0.297811 |
| O    | 1.148663  | 4.236588  | -1.755213 |
| O    | -0.372195 | 5.463092  | 0.156981  |
| O    | -2.462866 | 3.519734  | 0.323102  |
| H    | -2.906831 | 1.174502  | 0.300553  |
| H    | 2.885429  | -0.012115 | -0.958695 |
| H    | 3.260979  | -2.432620 | -1.005737 |
| H    | 2.447634  | -4.781396 | -0.673173 |
| H    | 0.591225  | -6.360944 | -0.167760 |
| H    | -1.686098 | -5.496063 | 0.352344  |
| H    | -3.253015 | -3.578194 | 0.651840  |
| H    | -3.677040 | -1.139685 | 0.657493  |
| H    | 2.560117  | 1.931556  | -0.658722 |
| H    | 2.095159  | 4.213447  | 0.120040  |
| H    | -0.005476 | 3.869949  | 1.378845  |
| H    | -1.260171 | 3.437353  | -1.379737 |
| H    | -0.115657 | 5.693246  | -0.762085 |
| H    | -2.525106 | 4.495211  | 0.288874  |
| H    | 4.307432  | 1.130402  | -0.087066 |
| O    | 4.336878  | 1.445700  | -1.015015 |
| H    | 2.049654  | 4.421387  | -2.078566 |

Table S24: BLYP 6-311+g\* **TS1** coordinates (Å).

| Atom | x         | y         | z         |
|------|-----------|-----------|-----------|
| C    | -1.919832 | 0.802064  | 0.046401  |
| C    | -0.905889 | 1.705245  | -0.184056 |
| C    | 0.478345  | 1.251741  | -0.299296 |
| C    | 0.743311  | -0.194585 | -0.347016 |
| C    | 2.041118  | -0.722014 | -0.620370 |
| C    | 2.261430  | -2.089854 | -0.631595 |
| C    | 1.210480  | -3.024500 | -0.370904 |
| C    | 1.421074  | -4.429924 | -0.365517 |
| C    | 0.364651  | -5.312917 | -0.115411 |
| C    | -0.926982 | -4.821121 | 0.129915  |
| C    | -1.185843 | -3.428512 | 0.129533  |
| C    | -2.496350 | -2.895398 | 0.365786  |
| C    | -2.729920 | -1.533078 | 0.349584  |
| C    | -1.671757 | -0.605656 | 0.105286  |
| C    | -0.338575 | -1.103959 | -0.119330 |
| C    | -0.105365 | -2.515966 | -0.119345 |
| C    | 1.520099  | 2.166346  | -0.243182 |
| C    | 1.296874  | 3.657526  | -0.198943 |
| C    | -0.083758 | 4.033864  | 0.362669  |
| C    | -1.185877 | 3.187523  | -0.327261 |
| O    | 1.331424  | 4.192062  | -1.568952 |
| O    | -0.351903 | 5.440041  | 0.214256  |
| O    | -2.486639 | 3.505484  | 0.201781  |
| H    | -2.940478 | 1.161303  | 0.173927  |
| H    | 2.867724  | -0.045325 | -0.851104 |
| H    | 3.261108  | -2.471282 | -0.851519 |
| H    | 2.422795  | -4.817856 | -0.560349 |
| H    | 0.544462  | -6.388777 | -0.113001 |
| H    | -1.747493 | -5.515167 | 0.322481  |
| H    | -3.319246 | -3.587564 | 0.554837  |
| H    | -3.737016 | -1.149040 | 0.520930  |
| H    | 2.575598  | 1.859329  | -0.294204 |
| H    | 2.089294  | 4.146703  | 0.387595  |
| H    | -0.108854 | 3.834606  | 1.443423  |
| H    | -1.166036 | 3.430336  | -1.407105 |
| H    | -0.028144 | 5.701927  | -0.674163 |
| H    | -2.581732 | 4.476930  | 0.135198  |
| H    | 4.684643  | 2.266603  | -1.712813 |
| O    | 4.213395  | 1.563298  | -1.221105 |
| H    | 2.258845  | 4.180475  | -1.876583 |

Table S25: B1LYP 6-311g\* **TS1** coordinates (Å).

| Atom | x         | y         | z         |
|------|-----------|-----------|-----------|
| C    | -1.903434 | 0.812822  | 0.085528  |
| C    | -0.912386 | 1.710165  | -0.176268 |
| C    | 0.460416  | 1.267158  | -0.346615 |
| C    | 0.737785  | -0.166816 | -0.406615 |
| C    | 2.027448  | -0.676132 | -0.715913 |
| C    | 2.247042  | -2.030950 | -0.728343 |
| C    | 1.217638  | -2.968009 | -0.428548 |
| C    | 1.437156  | -4.359514 | -0.425105 |
| C    | 0.405045  | -5.243841 | -0.136486 |
| C    | -0.870512 | -4.763484 | 0.150892  |
| C    | -1.134760 | -3.384020 | 0.153845  |
| C    | -2.431768 | -2.860632 | 0.434583  |
| C    | -2.673965 | -1.512913 | 0.422926  |
| C    | -1.637589 | -0.585265 | 0.137164  |
| C    | -0.321937 | -1.072577 | -0.135581 |
| C    | -0.080537 | -2.473606 | -0.136049 |
| C    | 1.486526  | 2.176567  | -0.344649 |
| C    | 1.265959  | 3.658008  | -0.238079 |
| C    | -0.104035 | 4.028635  | 0.317012  |
| C    | -1.196691 | 3.177937  | -0.344666 |
| O    | 1.331304  | 4.206511  | -1.568723 |
| O    | -0.380752 | 5.408860  | 0.142224  |
| O    | -2.470277 | 3.502604  | 0.180744  |
| H    | -2.915884 | 1.161098  | 0.238403  |
| H    | 2.836985  | 0.014787  | -0.983638 |
| H    | 3.233050  | -2.408026 | -0.977989 |
| H    | 2.427001  | -4.738004 | -0.651962 |
| H    | 0.591786  | -6.310275 | -0.136596 |
| H    | -1.673185 | -5.456741 | 0.373715  |
| H    | -3.236118 | -3.552775 | 0.655044  |
| H    | -3.668283 | -1.136479 | 0.629599  |
| H    | 2.540536  | 1.887474  | -0.567168 |
| H    | 2.051303  | 4.109026  | 0.375497  |
| H    | -0.127316 | 3.840523  | 1.392496  |
| H    | -1.173050 | 3.391861  | -1.423279 |
| H    | -0.044671 | 5.654619  | -0.730648 |
| H    | -2.545880 | 4.463353  | 0.132860  |
| H    | 4.481151  | 1.424001  | -0.557933 |
| O    | 4.051349  | 1.571172  | -1.412519 |
| H    | 2.242534  | 4.143788  | -1.878683 |

Table S26: B3LYP 6-311+g\* **TS1** coordinates (Å).

| Atom | x         | y         | z         |
|------|-----------|-----------|-----------|
| C    | -1.926684 | 0.799917  | 0.066966  |
| C    | -0.929046 | 1.695197  | -0.168340 |
| C    | 0.446011  | 1.245200  | -0.312246 |
| C    | 0.720656  | -0.190677 | -0.369564 |
| C    | 2.011502  | -0.706299 | -0.648928 |
| C    | 2.232536  | -2.062242 | -0.659821 |
| C    | 1.191701  | -2.994001 | -0.391866 |
| C    | 1.406124  | -4.387544 | -0.390054 |
| C    | 0.364708  | -5.268644 | -0.125780 |
| C    | -0.914809 | -4.783000 | 0.137377  |
| C    | -1.173288 | -3.401782 | 0.140563  |
| C    | -2.472983 | -2.874971 | 0.396388  |
| C    | -2.710436 | -1.524428 | 0.382986  |
| C    | -1.665310 | -0.601693 | 0.123069  |
| C    | -0.345439 | -1.093493 | -0.120542 |
| C    | -0.109651 | -2.494951 | -0.123791 |
| C    | 1.469827  | 2.149574  | -0.312380 |
| C    | 1.270970  | 3.631944  | -0.189846 |
| C    | -0.111383 | 4.012420  | 0.331667  |
| C    | -1.200884 | 3.166520  | -0.343523 |
| O    | 1.406107  | 4.207613  | -1.502533 |
| O    | -0.375621 | 5.396876  | 0.157780  |
| O    | -2.484442 | 3.491943  | 0.163698  |
| H    | -2.942885 | 1.146876  | 0.195661  |
| H    | 2.832941  | -0.031534 | -0.869862 |
| H    | 3.225038  | -2.438821 | -0.880642 |
| H    | 2.398799  | -4.769272 | -0.598261 |
| H    | 0.546581  | -6.335857 | -0.126282 |
| H    | -1.724936 | -5.473605 | 0.340731  |
| H    | -3.284586 | -3.564225 | 0.598598  |
| H    | -3.707965 | -1.145859 | 0.568952  |
| H    | 2.515840  | 1.865146  | -0.457068 |
| H    | 2.040743  | 4.049826  | 0.465357  |
| H    | -0.150054 | 3.827202  | 1.407007  |
| H    | -1.170630 | 3.377073  | -1.422107 |
| H    | -0.023027 | 5.664165  | -0.702574 |
| H    | -2.588592 | 4.448984  | 0.090043  |
| H    | 5.053819  | 2.056969  | -1.369428 |
| O    | 4.137789  | 1.761098  | -1.298820 |
| H    | 2.309941  | 4.059264  | -1.812106 |



Table S27: B3LYP 6-311g\* **TS1** coordinates (Å).

| Atom | x         | y         | z         |
|------|-----------|-----------|-----------|
| C    | -1.898136 | 0.814702  | 0.087722  |
| C    | -0.907922 | 1.712619  | -0.182318 |
| C    | 0.465103  | 1.270825  | -0.357789 |
| C    | 0.740397  | -0.164532 | -0.414053 |
| C    | 2.028099  | -0.675957 | -0.724887 |
| C    | 2.247615  | -2.031895 | -0.738453 |
| C    | 1.218992  | -2.967961 | -0.435886 |
| C    | 1.437834  | -4.360367 | -0.432185 |
| C    | 0.405599  | -5.244072 | -0.140750 |
| C    | -0.869291 | -4.762660 | 0.150134  |
| C    | -1.133304 | -3.382457 | 0.153097  |
| C    | -2.429007 | -2.858967 | 0.438394  |
| C    | -2.670343 | -1.510127 | 0.427805  |
| C    | -1.634793 | -0.583161 | 0.137346  |
| C    | -0.319855 | -1.070669 | -0.141207 |
| C    | -0.078975 | -2.471967 | -0.140812 |
| C    | 1.491142  | 2.183589  | -0.356144 |
| C    | 1.261911  | 3.665212  | -0.265863 |
| C    | -0.099398 | 4.029156  | 0.315135  |
| C    | -1.197139 | 3.179487  | -0.341183 |
| O    | 1.285511  | 4.205436  | -1.603747 |
| O    | -0.381090 | 5.410100  | 0.152150  |
| O    | -2.467512 | 3.501359  | 0.195640  |
| H    | -2.909616 | 1.165773  | 0.249188  |
| H    | 2.841654  | 0.014180  | -0.990367 |
| H    | 3.233950  | -2.409430 | -0.991323 |
| H    | 2.428161  | -4.739602 | -0.661188 |
| H    | 0.591834  | -6.311761 | -0.140770 |
| H    | -1.672535 | -5.455993 | 0.376248  |
| H    | -3.233627 | -3.551548 | 0.662098  |
| H    | -3.664618 | -1.132641 | 0.639022  |
| H    | 2.548763  | 1.891969  | -0.559108 |
| H    | 2.056672  | 4.132762  | 0.324230  |
| H    | -0.107564 | 3.833277  | 1.390561  |
| H    | -1.181196 | 3.399911  | -1.419981 |
| H    | -0.061415 | 5.655976  | -0.729281 |
| H    | -2.537134 | 4.465028  | 0.160426  |
| H    | 4.439604  | 1.319730  | -0.461928 |
| O    | 4.100665  | 1.527076  | -1.346316 |
| H    | 2.199948  | 4.218508  | -1.913180 |

Table S28: B3LYP 6-311+g\* **TS1** coordinates (Å).

| Atom | x         | y         | z         |
|------|-----------|-----------|-----------|
| C    | -1.919832 | 0.802064  | 0.046401  |
| C    | -0.905889 | 1.705245  | -0.184056 |
| C    | 0.478345  | 1.251741  | -0.299296 |
| C    | 0.743311  | -0.194585 | -0.347016 |
| C    | 2.041118  | -0.722014 | -0.620370 |
| C    | 2.261430  | -2.089854 | -0.631595 |
| C    | 1.210480  | -3.024500 | -0.370904 |
| C    | 1.421074  | -4.429924 | -0.365517 |
| C    | 0.364651  | -5.312917 | -0.115411 |
| C    | -0.926982 | -4.821121 | 0.129915  |
| C    | -1.185843 | -3.428512 | 0.129533  |
| C    | -2.496350 | -2.895398 | 0.365786  |
| C    | -2.729920 | -1.533078 | 0.349584  |
| C    | -1.671757 | -0.605656 | 0.105286  |
| C    | -0.338575 | -1.103959 | -0.119330 |
| C    | -0.105365 | -2.515966 | -0.119345 |
| C    | 1.520099  | 2.166346  | -0.243182 |
| C    | 1.296874  | 3.657526  | -0.198943 |
| C    | -0.083758 | 4.033864  | 0.362669  |
| C    | -1.185877 | 3.187523  | -0.327261 |
| O    | 1.331424  | 4.192062  | -1.568952 |
| O    | -0.351903 | 5.440041  | 0.214256  |
| O    | -2.486639 | 3.505484  | 0.201781  |
| H    | -2.940478 | 1.161303  | 0.173927  |
| H    | 2.867724  | -0.045325 | -0.851104 |
| H    | 3.261108  | -2.471282 | -0.851519 |
| H    | 2.422795  | -4.817856 | -0.560349 |
| H    | 0.544462  | -6.388777 | -0.113001 |
| H    | -1.747493 | -5.515167 | 0.322481  |
| H    | -3.319246 | -3.587564 | 0.554837  |
| H    | -3.737016 | -1.149040 | 0.520930  |
| H    | 2.575598  | 1.859329  | -0.294204 |
| H    | 2.089294  | 4.146703  | 0.387595  |
| H    | -0.108854 | 3.834606  | 1.443423  |
| H    | -1.166036 | 3.430336  | -1.407105 |
| H    | -0.028144 | 5.701927  | -0.674163 |
| H    | -2.581732 | 4.476930  | 0.135198  |
| H    | 4.684643  | 2.266603  | -1.712813 |
| O    | 4.213395  | 1.563298  | -1.221105 |
| H    | 2.258845  | 4.180475  | -1.876583 |

Table S29: BPW91 6-311g\* **TS2** coordinates (Å).

| Atom | x         | y         | z         |
|------|-----------|-----------|-----------|
| C    | -1.850850 | 0.819911  | -0.178353 |
| C    | -0.808219 | 1.719524  | -0.340533 |
| C    | 0.557066  | 1.253229  | -0.351394 |
| C    | 0.813071  | -0.171591 | -0.313041 |
| C    | 2.126795  | -0.713300 | -0.456472 |
| C    | 2.353352  | -2.069413 | -0.392696 |
| C    | 1.283584  | -2.995998 | -0.189233 |
| C    | 1.492311  | -4.392962 | -0.110773 |
| C    | 0.418226  | -5.265348 | 0.071602  |
| C    | -0.888002 | -4.770998 | 0.173824  |
| C    | -1.144903 | -3.386611 | 0.096930  |
| C    | -2.471932 | -2.848189 | 0.189161  |
| C    | -2.701011 | -1.496889 | 0.104233  |
| C    | -1.623012 | -0.571904 | -0.072502 |
| C    | -0.280132 | -1.075872 | -0.153888 |
| C    | -0.047575 | -2.482882 | -0.082043 |
| C    | 1.603185  | 2.190222  | -0.217215 |
| C    | 1.358391  | 3.680427  | -0.365152 |
| C    | -0.004607 | 3.983291  | 0.334873  |
| C    | -1.076567 | 3.191136  | -0.434778 |
| O    | 1.310719  | 3.981891  | -1.715508 |
| O    | -0.365396 | 5.363216  | 0.227774  |
| O    | -2.390367 | 3.510255  | 0.017381  |
| H    | -2.871129 | 1.199668  | -0.118506 |
| H    | 2.954716  | -0.038827 | -0.669586 |
| H    | 3.368379  | -2.456071 | -0.510161 |
| H    | 2.508382  | -4.784469 | -0.195584 |
| H    | 0.596318  | -6.340436 | 0.132296  |
| H    | -1.723363 | -5.460610 | 0.314078  |
| H    | -3.308078 | -3.537896 | 0.325241  |
| H    | -3.718912 | -1.106796 | 0.169833  |
| H    | 2.551805  | 1.845945  | 0.193075  |
| H    | 2.144292  | 4.252414  | 0.178752  |
| H    | 0.008698  | 3.668409  | 1.392865  |
| H    | -0.937551 | 3.498848  | -1.492740 |
| H    | -0.118864 | 5.807250  | 1.055246  |
| H    | -2.392041 | 4.484430  | 0.080643  |
| H    | 3.740299  | 2.386226  | -1.926418 |
| O    | 2.857192  | 2.086273  | -2.206334 |
| H    | 2.244710  | 2.955407  | -2.194417 |

Table S30: BPW91 6-311+g\* **TS2** coordinates (Å).

| Atom | x         | y         | z         |
|------|-----------|-----------|-----------|
| C    | -1.839368 | 0.822207  | -0.204988 |
| C    | -0.795638 | 1.721694  | -0.345010 |
| C    | 0.570581  | 1.255839  | -0.348034 |
| C    | 0.828776  | -0.171273 | -0.294326 |
| C    | 2.144413  | -0.717038 | -0.392306 |
| C    | 2.367566  | -2.073977 | -0.316746 |
| C    | 1.291395  | -2.998670 | -0.147698 |
| C    | 1.497001  | -4.396032 | -0.059994 |
| C    | 0.417421  | -5.267241 | 0.095615  |
| C    | -0.890294 | -4.769996 | 0.162138  |
| C    | -1.142625 | -3.384895 | 0.075483  |
| C    | -2.470481 | -2.845997 | 0.135074  |
| C    | -2.695417 | -1.493381 | 0.046111  |
| C    | -1.612068 | -0.571528 | -0.105317 |
| C    | -0.268273 | -1.075550 | -0.158347 |
| C    | -0.040333 | -2.482922 | -0.077456 |
| C    | 1.617886  | 2.190914  | -0.253068 |
| C    | 1.377375  | 3.692916  | -0.346535 |
| C    | 0.012801  | 3.975158  | 0.352308  |
| C    | -1.065377 | 3.198175  | -0.420830 |
| O    | 1.362178  | 4.075835  | -1.684893 |
| O    | -0.346774 | 5.360910  | 0.291149  |
| O    | -2.380822 | 3.499484  | 0.054000  |
| H    | -2.861865 | 1.197553  | -0.157556 |
| H    | 2.990212  | -0.051616 | -0.558845 |
| H    | 3.386437  | -2.460462 | -0.396016 |
| H    | 2.514813  | -4.788625 | -0.115624 |
| H    | 0.592281  | -6.342482 | 0.163829  |
| H    | -1.730399 | -5.457848 | 0.282362  |
| H    | -3.310931 | -3.534246 | 0.251577  |
| H    | -3.713895 | -1.101616 | 0.089818  |
| H    | 2.586555  | 1.848436  | 0.109031  |
| H    | 2.162905  | 4.223744  | 0.235519  |
| H    | 0.035498  | 3.639540  | 1.403531  |
| H    | -0.962061 | 3.519679  | -1.476790 |
| H    | -0.091009 | 5.788170  | 1.125825  |
| H    | -2.410840 | 4.473496  | 0.120480  |
| H    | 3.620406  | 2.272597  | -2.197078 |
| O    | 2.671886  | 2.093995  | -2.331026 |
| H    | 2.149066  | 3.045963  | -2.234889 |

Table S31: BLYP 6-311g\* **TS2** coordinates (Å).

| Atom | x         | y         | z         |
|------|-----------|-----------|-----------|
| C    | -1.844480 | 0.827764  | -0.158115 |
| C    | -0.797228 | 1.725559  | -0.323693 |
| C    | 0.569923  | 1.252603  | -0.353748 |
| C    | 0.820874  | -0.178380 | -0.321521 |
| C    | 2.134275  | -0.731981 | -0.476411 |
| C    | 2.353212  | -2.092058 | -0.419035 |
| C    | 1.277277  | -3.017264 | -0.211222 |
| C    | 1.478268  | -4.419260 | -0.138821 |
| C    | 0.397850  | -5.288008 | 0.049383  |
| C    | -0.907820 | -4.785573 | 0.163722  |
| C    | -1.158979 | -3.396068 | 0.093303  |
| C    | -2.485927 | -2.847878 | 0.198088  |
| C    | -2.708045 | -1.492633 | 0.120013  |
| C    | -1.623390 | -0.569431 | -0.062059 |
| C    | -0.279669 | -1.081285 | -0.156958 |
| C    | -0.054177 | -2.494688 | -0.091607 |
| C    | 1.628479  | 2.188828  | -0.246327 |
| C    | 1.388890  | 3.696112  | -0.369608 |
| C    | 0.027738  | 3.997528  | 0.349079  |
| C    | -1.066520 | 3.208815  | -0.401431 |
| O    | 1.335412  | 4.039977  | -1.719160 |
| O    | -0.335015 | 5.390591  | 0.254737  |
| O    | -2.377339 | 3.521921  | 0.101931  |
| H    | -2.861680 | 1.211407  | -0.084917 |
| H    | 2.966938  | -0.065285 | -0.690665 |
| H    | 3.365300  | -2.483503 | -0.543895 |
| H    | 2.490918  | -4.816927 | -0.232562 |
| H    | 0.570219  | -6.364122 | 0.105176  |
| H    | -1.745210 | -5.471449 | 0.308337  |
| H    | -3.324878 | -3.533010 | 0.338168  |
| H    | -3.722832 | -1.096867 | 0.195556  |
| H    | 2.574936  | 1.845223  | 0.166639  |
| H    | 2.186395  | 4.245111  | 0.181408  |
| H    | 0.055741  | 3.684457  | 1.406539  |
| H    | -0.975022 | 3.526712  | -1.458591 |
| H    | -0.050924 | 5.835481  | 1.072974  |
| H    | -2.382262 | 4.497787  | 0.172340  |
| H    | 3.682186  | 2.345008  | -1.989559 |
| O    | 2.771254  | 2.088861  | -2.234425 |
| H    | 2.194291  | 3.006833  | -2.222583 |

Table S32: BLYP 6-311+g\* **TS2** coordinates (Å).

| Atom | x         | y         | z         |
|------|-----------|-----------|-----------|
| C    | -1.835820 | 0.819849  | -0.211883 |
| C    | -0.790107 | 1.720648  | -0.337398 |
| C    | 0.582766  | 1.254729  | -0.334905 |
| C    | 0.841812  | -0.180121 | -0.277776 |
| C    | 2.160513  | -0.732931 | -0.358512 |
| C    | 2.379825  | -2.093639 | -0.281233 |
| C    | 1.297564  | -3.019719 | -0.126797 |
| C    | 1.499074  | -4.421678 | -0.038106 |
| C    | 0.413199  | -5.292938 | 0.104358  |
| C    | -0.897304 | -4.791716 | 0.156834  |
| C    | -1.147003 | -3.402081 | 0.069153  |
| C    | -2.477635 | -2.858494 | 0.114650  |
| C    | -2.699087 | -1.501995 | 0.025194  |
| C    | -1.609952 | -0.579430 | -0.112935 |
| C    | -0.261970 | -1.086219 | -0.153016 |
| C    | -0.037555 | -2.498969 | -0.070610 |
| C    | 1.633034  | 2.190541  | -0.271909 |
| C    | 1.399287  | 3.707494  | -0.321543 |
| C    | 0.019006  | 3.991667  | 0.352363  |
| C    | -1.063560 | 3.207649  | -0.416087 |
| O    | 1.428984  | 4.148813  | -1.658805 |
| O    | -0.345392 | 5.389766  | 0.286138  |
| O    | -2.387728 | 3.501870  | 0.080426  |
| H    | -2.858733 | 1.192647  | -0.174561 |
| H    | 3.013746  | -0.073839 | -0.505973 |
| H    | 3.398881  | -2.481067 | -0.346164 |
| H    | 2.515964  | -4.816846 | -0.082326 |
| H    | 0.584885  | -6.368241 | 0.173082  |
| H    | -1.739428 | -5.478153 | 0.266411  |
| H    | -3.320817 | -3.544412 | 0.220468  |
| H    | -3.716829 | -1.108592 | 0.058436  |
| H    | 2.617473  | 1.850166  | 0.039811  |
| H    | 2.181134  | 4.204594  | 0.291378  |
| H    | 0.033905  | 3.667458  | 1.406222  |
| H    | -0.990735 | 3.526540  | -1.472361 |
| H    | -0.064857 | 5.828567  | 1.110221  |
| H    | -2.432223 | 4.477961  | 0.140983  |
| H    | 3.555880  | 2.248919  | -2.319049 |
| O    | 2.589245  | 2.143640  | -2.419641 |
| H    | 2.099541  | 3.168474  | -2.234061 |

Table S33: B1LYP 6-311g\* **TS2** coordinates (Å).

| Atom | x         | y         | z         |
|------|-----------|-----------|-----------|
| C    | -1.835393 | 0.817059  | -0.195811 |
| C    | -0.798008 | 1.712338  | -0.334015 |
| C    | 0.560053  | 1.247494  | -0.339017 |
| C    | 0.821045  | -0.169345 | -0.292400 |
| C    | 2.136088  | -0.711923 | -0.405781 |
| C    | 2.357087  | -2.057703 | -0.337858 |
| C    | 1.285099  | -2.983968 | -0.161200 |
| C    | 1.492168  | -4.372799 | -0.080561 |
| C    | 0.419985  | -5.241682 | 0.077452  |
| C    | -0.881608 | -4.748550 | 0.152793  |
| C    | -1.133652 | -3.371965 | 0.072853  |
| C    | -2.460038 | -2.833198 | 0.140035  |
| C    | -2.685704 | -1.492515 | 0.055709  |
| C    | -1.605119 | -0.568926 | -0.097865 |
| C    | -0.268709 | -1.069907 | -0.156864 |
| C    | -0.039207 | -2.473740 | -0.081833 |
| C    | 1.602155  | 2.183467  | -0.236935 |
| C    | 1.358445  | 3.688025  | -0.365871 |
| C    | 0.002434  | 3.971648  | 0.331441  |
| C    | -1.075030 | 3.187874  | -0.414712 |
| O    | 1.335286  | 4.034582  | -1.695270 |
| O    | -0.373311 | 5.342583  | 0.249349  |
| O    | -2.372092 | 3.478549  | 0.086705  |
| H    | -2.849288 | 1.189552  | -0.144491 |
| H    | 2.967606  | -0.048509 | -0.590992 |
| H    | 3.366788  | -2.441865 | -0.429552 |
| H    | 2.501997  | -4.761545 | -0.143559 |
| H    | 0.595186  | -6.308681 | 0.140154  |
| H    | -1.713325 | -5.433047 | 0.274161  |
| H    | -3.292163 | -3.518136 | 0.257247  |
| H    | -3.695858 | -1.103454 | 0.103847  |
| H    | 2.554347  | 1.848496  | 0.145907  |
| H    | 2.145464  | 4.215629  | 0.206767  |
| H    | 0.023255  | 3.653282  | 1.380704  |
| H    | -0.993939 | 3.497234  | -1.464236 |
| H    | 0.015328  | 5.819517  | 0.988361  |
| H    | -2.404686 | 4.439474  | 0.170737  |
| H    | 3.625809  | 2.276838  | -2.044632 |
| O    | 2.705258  | 2.058025  | -2.229145 |
| H    | 2.175228  | 2.960702  | -2.221144 |

Table S34: BILYP 6-311+g\* **TS2** coordinates (Å).

| Atom | x         | y         | z         |
|------|-----------|-----------|-----------|
| C    | -1.822329 | 0.817870  | -0.215847 |
| C    | -0.783029 | 1.712201  | -0.333769 |
| C    | 0.574749  | 1.248318  | -0.330329 |
| C    | 0.836812  | -0.169439 | -0.266118 |
| C    | 2.153310  | -0.716509 | -0.334918 |
| C    | 2.370821  | -2.063105 | -0.259761 |
| C    | 1.293149  | -2.988307 | -0.119109 |
| C    | 1.496964  | -4.377752 | -0.035063 |
| C    | 0.419595  | -5.246043 | 0.093737  |
| C    | -0.882805 | -4.750347 | 0.137375  |
| C    | -1.130334 | -3.372495 | 0.053812  |
| C    | -2.457119 | -2.833164 | 0.090930  |
| C    | -2.678751 | -1.491013 | 0.005046  |
| C    | -1.593306 | -0.569860 | -0.121888 |
| C    | -0.256441 | -1.070652 | -0.153394 |
| C    | -0.031285 | -2.475354 | -0.072836 |
| C    | 1.623050  | 2.181741  | -0.293655 |
| C    | 1.384472  | 3.701350  | -0.344392 |
| C    | 0.021336  | 3.965141  | 0.341537  |
| C    | -1.059980 | 3.191957  | -0.408154 |
| O    | 1.419802  | 4.153451  | -1.650503 |
| O    | -0.354673 | 5.340055  | 0.301384  |
| O    | -2.357937 | 3.471988  | 0.107308  |
| H    | -2.838133 | 1.186846  | -0.180703 |
| H    | 3.001043  | -0.061315 | -0.470870 |
| H    | 3.383265  | -2.446999 | -0.315418 |
| H    | 2.507709  | -4.767619 | -0.072031 |
| H    | 0.591516  | -6.313454 | 0.158859  |
| H    | -1.718626 | -5.433503 | 0.236580  |
| H    | -3.292879 | -3.516975 | 0.187438  |
| H    | -3.689143 | -1.100523 | 0.032094  |
| H    | 2.595055  | 1.849571  | 0.037045  |
| H    | 2.164422  | 4.172247  | 0.279865  |
| H    | 0.049538  | 3.627682  | 1.384100  |
| H    | -1.007865 | 3.506393  | -1.457274 |
| H    | 0.046394  | 5.807835  | 1.041058  |
| H    | -2.415947 | 4.432443  | 0.191328  |
| H    | 3.445521  | 2.148472  | -2.287367 |
| O    | 2.484024  | 2.084462  | -2.331778 |
| H    | 2.077016  | 3.075317  | -2.253843 |



Table S35: B3LYP 6-311g\* **TS2** coordinates (Å).

| Atom | x         | y         | z         |
|------|-----------|-----------|-----------|
| C    | -1.837842 | 0.817124  | -0.191065 |
| C    | -0.800353 | 1.712607  | -0.335322 |
| C    | 0.558462  | 1.247751  | -0.341183 |
| C    | 0.818475  | -0.169840 | -0.297666 |
| C    | 2.132251  | -0.711563 | -0.420491 |
| C    | 2.354328  | -2.058602 | -0.354595 |
| C    | 1.283864  | -2.984430 | -0.170219 |
| C    | 1.491259  | -4.374017 | -0.090783 |
| C    | 0.419732  | -5.243147 | 0.074246  |
| C    | -0.881853 | -4.750190 | 0.157774  |
| C    | -1.135039 | -3.372932 | 0.079070  |
| C    | -2.460586 | -2.834517 | 0.153789  |
| C    | -2.687076 | -1.492602 | 0.069501  |
| C    | -1.608074 | -0.569228 | -0.090848 |
| C    | -0.271214 | -1.070580 | -0.156243 |
| C    | -0.040986 | -2.474085 | -0.082493 |
| C    | 1.600320  | 2.183097  | -0.228786 |
| C    | 1.357425  | 3.683664  | -0.364122 |
| C    | -0.000763 | 3.973360  | 0.328624  |
| C    | -1.075810 | 3.186673  | -0.420538 |
| O    | 1.333425  | 4.016433  | -1.698717 |
| O    | -0.373512 | 5.345228  | 0.237335  |
| O    | -2.375830 | 3.483264  | 0.070704  |
| H    | -2.852437 | 1.191070  | -0.137273 |
| H    | 2.961466  | -0.045726 | -0.614647 |
| H    | 3.364344  | -2.443194 | -0.454368 |
| H    | 2.501755  | -4.763094 | -0.160448 |
| H    | 0.595654  | -6.311239 | 0.136013  |
| H    | -1.713607 | -5.435465 | 0.284610  |
| H    | -3.292867 | -3.520141 | 0.276435  |
| H    | -3.698261 | -1.103596 | 0.122849  |
| H    | 2.550217  | 1.845946  | 0.161633  |
| H    | 2.142950  | 4.220758  | 0.203422  |
| H    | 0.016316  | 3.659057  | 1.380140  |
| H    | -0.984190 | 3.493832  | -1.471834 |
| H    | -0.013275 | 5.818844  | 0.994729  |
| H    | -2.402718 | 4.446602  | 0.151447  |
| H    | 3.656166  | 2.296420  | -2.007190 |
| O    | 2.743003  | 2.060340  | -2.214652 |
| H    | 2.193862  | 2.957026  | -2.208359 |

Table S36: B3LYP 6-311+g\* **TS2** coordinates (Å).

| Atom | x         | y         | z         |
|------|-----------|-----------|-----------|
| C    | -1.823875 | 0.818238  | -0.215115 |
| C    | -0.784598 | 1.712684  | -0.335847 |
| C    | 0.574657  | 1.249014  | -0.332237 |
| C    | 0.836013  | -0.170344 | -0.270228 |
| C    | 2.151293  | -0.716992 | -0.343637 |
| C    | 2.369435  | -2.064986 | -0.268331 |
| C    | 1.292507  | -2.989226 | -0.123059 |
| C    | 1.496153  | -4.379467 | -0.037931 |
| C    | 0.418763  | -5.247644 | 0.095355  |
| C    | -0.883831 | -4.751688 | 0.142278  |
| C    | -1.131894 | -3.373188 | 0.057685  |
| C    | -2.457873 | -2.834118 | 0.097897  |
| C    | -2.679788 | -1.490585 | 0.010933  |
| C    | -1.595331 | -0.570213 | -0.119689 |
| C    | -0.257759 | -1.071467 | -0.154119 |
| C    | -0.032553 | -2.475775 | -0.073223 |
| C    | 1.621385  | 2.181671  | -0.285981 |
| C    | 1.383480  | 3.698041  | -0.339949 |
| C    | 0.018766  | 3.964675  | 0.343296  |
| C    | -1.060031 | 3.191327  | -0.411597 |
| O    | 1.416327  | 4.142997  | -1.650541 |
| O    | -0.355765 | 5.340699  | 0.299850  |
| O    | -2.361517 | 3.475416  | 0.094383  |
| H    | -2.840610 | 1.188227  | -0.178745 |
| H    | 2.998865  | -0.060497 | -0.484236 |
| H    | 3.382703  | -2.449391 | -0.327639 |
| H    | 2.507821  | -4.769840 | -0.077645 |
| H    | 0.590945  | -6.316094 | 0.161419  |
| H    | -1.720369 | -5.435260 | 0.244984  |
| H    | -3.294425 | -3.518326 | 0.197562  |
| H    | -3.691293 | -1.099906 | 0.040164  |
| H    | 2.594903  | 1.847157  | 0.042379  |
| H    | 2.162875  | 4.176070  | 0.281539  |
| H    | 0.043722  | 3.627408  | 1.387095  |
| H    | -0.998061 | 3.506118  | -1.461807 |
| H    | 0.024962  | 5.803759  | 1.055212  |
| H    | -2.413044 | 4.437971  | 0.180978  |
| H    | 3.471055  | 2.166263  | -2.283415 |
| O    | 2.509512  | 2.089082  | -2.340368 |
| H    | 2.085455  | 3.079101  | -2.247194 |

Table S37: BPW91 6-311g\* **TS3** coordinates (Å).

| Atom | x         | y         | z         |
|------|-----------|-----------|-----------|
| C    | 0.457528  | 4.173041  | 1.334696  |
| C    | 0.025677  | 2.755641  | 1.576078  |
| C    | 0.552723  | 1.739238  | 0.688729  |
| C    | 1.688434  | 2.012423  | -0.065183 |
| C    | 2.343792  | 3.352229  | -0.120336 |
| C    | 1.969656  | 4.276250  | 1.037827  |
| C    | -0.029809 | 0.403428  | 0.711427  |
| C    | -0.972324 | 0.089204  | 1.737973  |
| C    | -1.379113 | 1.095377  | 2.680766  |
| C    | -0.884665 | 2.423718  | 2.554408  |
| C    | -1.523011 | -1.223552 | 1.828390  |
| C    | -1.148999 | -2.222757 | 0.877971  |
| C    | -0.229604 | -1.867161 | -0.155009 |
| C    | 0.315796  | -0.603155 | -0.237077 |
| C    | -2.452466 | -1.546112 | 2.868167  |
| C    | -2.978597 | -2.853958 | 2.939874  |
| C    | -2.606756 | -3.828319 | 2.006628  |
| C    | -1.706164 | -3.519409 | 0.985586  |
| C    | -2.308233 | 0.748955  | 3.705929  |
| C    | -2.821701 | -0.524959 | 3.800495  |
| O    | 1.754082  | 3.851567  | -1.320115 |
| O    | 2.298073  | 5.628384  | 0.713218  |
| O    | 0.091896  | 5.018005  | 2.419717  |
| O    | 3.120419  | 3.061718  | -3.187644 |
| As   | 2.800552  | 1.446610  | -3.736379 |
| O    | 2.611610  | 0.302736  | -2.509378 |
| C    | 1.210210  | 1.516608  | -4.879529 |
| C    | 4.312295  | 1.014308  | -4.897423 |
| H    | -1.249034 | 3.195742  | 3.232579  |
| H    | 1.002744  | -0.370270 | -1.055841 |
| H    | 0.039384  | -2.619644 | -0.899688 |
| H    | -1.422511 | -4.281787 | 0.256926  |
| H    | -3.025254 | -4.833436 | 2.076543  |
| H    | -3.685980 | -3.099988 | 3.734524  |
| H    | -3.530064 | -0.770089 | 4.594824  |
| H    | -2.611456 | 1.516621  | 4.420105  |
| H    | 2.120035  | 1.257331  | -0.736451 |
| H    | 3.441411  | 3.275132  | -0.211924 |
| H    | 2.530955  | 4.018914  | 1.948858  |
| H    | -0.056939 | 4.500792  | 0.407007  |
| H    | 2.054167  | 5.714348  | -0.233176 |
| H    | 0.492823  | 5.882681  | 2.211635  |
| H    | 1.362114  | 2.250891  | -5.680087 |
| H    | 0.354398  | 1.815902  | -4.262319 |
| H    | 1.023483  | 0.525615  | -5.311381 |
| H    | 4.404021  | 1.777025  | -5.680073 |
| H    | 2.387514  | 3.451810  | -2.231052 |
| H    | 4.149909  | 0.029410  | -5.352010 |
| H    | 5.223859  | 0.995175  | -4.288483 |

Table S38: BPW91 6-311+g\* **TS3** coordinates (Å).

| Atom | x         | y         | z         |
|------|-----------|-----------|-----------|
| C    | 0.530483  | 4.181033  | 1.436597  |
| C    | 0.062397  | 2.758405  | 1.616256  |
| C    | 0.552736  | 1.753280  | 0.701981  |
| C    | 1.656153  | 2.037097  | -0.107213 |
| C    | 2.280871  | 3.386161  | -0.190657 |
| C    | 2.011789  | 4.249012  | 1.042823  |
| C    | -0.038666 | 0.425258  | 0.716246  |
| C    | -0.986120 | 0.108467  | 1.739173  |
| C    | -1.380315 | 1.107866  | 2.691675  |
| C    | -0.857417 | 2.426125  | 2.588324  |
| C    | -1.553701 | -1.198760 | 1.814932  |
| C    | -1.187632 | -2.194415 | 0.857406  |
| C    | -0.258876 | -1.839566 | -0.169014 |
| C    | 0.298951  | -0.581629 | -0.238153 |
| C    | -2.491362 | -1.519678 | 2.848478  |
| C    | -3.033985 | -2.821909 | 2.905681  |
| C    | -2.669034 | -3.792173 | 1.965556  |
| C    | -1.759063 | -3.484973 | 0.951067  |
| C    | -2.318241 | 0.763966  | 3.711450  |
| C    | -2.850649 | -0.502801 | 3.790314  |
| O    | 1.526856  | 3.769074  | -1.338799 |
| O    | 2.303527  | 5.639530  | 0.832633  |
| O    | 0.272357  | 4.946651  | 2.614284  |
| O    | 2.720617  | 3.101991  | -3.371503 |
| As   | 2.693364  | 1.435124  | -3.874518 |
| O    | 2.601495  | 0.320976  | -2.602121 |
| C    | 1.182137  | 1.219491  | -5.099809 |
| C    | 4.322695  | 1.199990  | -4.925771 |
| H    | -1.201560 | 3.189425  | 3.286666  |
| H    | 0.993119  | -0.355141 | -1.051351 |
| H    | 0.007115  | -2.589289 | -0.917976 |
| H    | -1.480116 | -4.244674 | 0.217446  |
| H    | -3.099476 | -4.793285 | 2.024503  |
| H    | -3.747925 | -3.066952 | 3.695177  |
| H    | -3.565415 | -0.746376 | 4.579723  |
| H    | -2.611625 | 1.528003  | 4.434115  |
| H    | 2.058031  | 1.295505  | -0.808690 |
| H    | 3.362188  | 3.346829  | -0.405858 |
| H    | 2.617670  | 3.856077  | 1.878639  |
| H    | -0.042370 | 4.606802  | 0.588145  |
| H    | 3.243613  | 5.797894  | 1.024549  |
| H    | 0.689861  | 5.815512  | 2.458630  |
| H    | 1.260848  | 1.952807  | -5.911848 |
| H    | 0.254225  | 1.383208  | -4.538756 |
| H    | 1.192484  | 0.202332  | -5.510774 |
| H    | 4.339253  | 1.931866  | -5.742533 |
| H    | 2.084957  | 3.410175  | -2.304657 |
| H    | 4.344936  | 0.182295  | -5.334499 |
| H    | 5.185694  | 1.355629  | -4.267650 |

Table S39: BLYP 6-311g\* **TS3** coordinates (Å).

| Atom | x         | y         | z         |
|------|-----------|-----------|-----------|
| C    | 0.508636  | 4.193509  | 1.405595  |
| C    | 0.047507  | 2.762264  | 1.593409  |
| C    | 0.560057  | 1.749415  | 0.691495  |
| C    | 1.683486  | 2.032247  | -0.098259 |
| C    | 2.302145  | 3.391376  | -0.185734 |
| C    | 2.001583  | 4.271859  | 1.035519  |
| C    | -0.029087 | 0.414978  | 0.707983  |
| C    | -0.985514 | 0.099523  | 1.730207  |
| C    | -1.394452 | 1.106922  | 2.675681  |
| C    | -0.880321 | 2.431368  | 2.561665  |
| C    | -1.546764 | -1.215164 | 1.813158  |
| C    | -1.169811 | -2.218226 | 0.860179  |
| C    | -0.238360 | -1.860977 | -0.169208 |
| C    | 0.314048  | -0.598600 | -0.245672 |
| C    | -2.490720 | -1.535937 | 2.848060  |
| C    | -3.025075 | -2.844938 | 2.911686  |
| C    | -2.648887 | -3.820916 | 1.977525  |
| C    | -1.735506 | -3.514402 | 0.961732  |
| C    | -2.338656 | 0.761690  | 3.695361  |
| C    | -2.862542 | -0.510231 | 3.782272  |
| O    | 1.555183  | 3.760856  | -1.354144 |
| O    | 2.274496  | 5.672546  | 0.804054  |
| O    | 0.231500  | 4.973358  | 2.579249  |
| O    | 2.888384  | 3.088876  | -3.306435 |
| As   | 2.718351  | 1.432896  | -3.829207 |
| O    | 2.588192  | 0.297240  | -2.575205 |
| C    | 1.146496  | 1.351340  | -5.029207 |
| C    | 4.302987  | 1.098622  | -4.958593 |
| H    | -1.234175 | 3.199663  | 3.248579  |
| H    | 1.002323  | -0.370702 | -1.062481 |
| H    | 0.031152  | -2.612660 | -0.914465 |
| H    | -1.450157 | -4.277408 | 0.234680  |
| H    | -3.072730 | -4.824138 | 2.041824  |
| H    | -3.740209 | -3.089913 | 3.699483  |
| H    | -3.579522 | -0.752588 | 4.569477  |
| H    | -2.641765 | 1.529563  | 4.409305  |
| H    | 2.106554  | 1.283002  | -0.775740 |
| H    | 3.385320  | 3.361793  | -0.389410 |
| H    | 2.593525  | 3.903021  | 1.891296  |
| H    | -0.049201 | 4.608058  | 0.542706  |
| H    | 3.210732  | 5.841776  | 1.013479  |
| H    | 0.662249  | 5.835563  | 2.412257  |
| H    | 1.261768  | 2.085817  | -5.835724 |
| H    | 0.251369  | 1.586035  | -4.440547 |
| H    | 1.057087  | 0.342398  | -5.450575 |
| H    | 4.353232  | 1.855833  | -5.750263 |
| H    | 2.167693  | 3.419340  | -2.297954 |
| H    | 4.226493  | 0.097839  | -5.400802 |
| H    | 5.197779  | 1.158449  | -4.327965 |

Table S40: BLYP 6-311+g\* **TS3** coordinates (Å).

| Atom | x         | y         | z         |
|------|-----------|-----------|-----------|
| C    | 0.526337  | 4.184340  | 1.444813  |
| C    | 0.050763  | 2.754535  | 1.625800  |
| C    | 0.551268  | 1.739202  | 0.716574  |
| C    | 1.657976  | 2.019726  | -0.090611 |
| C    | 2.283584  | 3.376576  | -0.193195 |
| C    | 2.012574  | 4.248954  | 1.045130  |
| C    | -0.044425 | 0.404766  | 0.738089  |
| C    | -1.000360 | 0.094513  | 1.761482  |
| C    | -1.402131 | 1.104659  | 2.706417  |
| C    | -0.877563 | 2.426950  | 2.593956  |
| C    | -1.569450 | -1.216865 | 1.845899  |
| C    | -1.198501 | -2.223237 | 0.894555  |
| C    | -0.263979 | -1.873739 | -0.134005 |
| C    | 0.294759  | -0.612973 | -0.210621 |
| C    | -2.514833 | -1.530951 | 2.881356  |
| C    | -3.057538 | -2.837110 | 2.946762  |
| C    | -2.687197 | -3.817146 | 2.013561  |
| C    | -1.771587 | -3.516954 | 0.997340  |
| C    | -2.347502 | 0.767075  | 3.726682  |
| C    | -2.880044 | -0.502625 | 3.814782  |
| O    | 1.558371  | 3.779731  | -1.359548 |
| O    | 2.310257  | 5.649970  | 0.826347  |
| O    | 0.273578  | 4.948612  | 2.641389  |
| O    | 2.753449  | 3.122777  | -3.403097 |
| As   | 2.712529  | 1.445312  | -3.933752 |
| O    | 2.592966  | 0.312534  | -2.669207 |
| C    | 1.196617  | 1.274002  | -5.189205 |
| C    | 4.369206  | 1.224724  | -4.978111 |
| H    | -1.227608 | 3.193223  | 3.284875  |
| H    | 0.988784  | -0.393753 | -1.023479 |
| H    | 0.004839  | -2.627959 | -0.876798 |
| H    | -1.490160 | -4.282459 | 0.271389  |
| H    | -3.116920 | -4.817754 | 2.079114  |
| H    | -3.774082 | -3.076984 | 3.734877  |
| H    | -3.598040 | -0.739371 | 4.602759  |
| H    | -2.645695 | 1.536663  | 4.440826  |
| H    | 2.062249  | 1.272246  | -0.778203 |
| H    | 3.369110  | 3.325891  | -0.387228 |
| H    | 2.621757  | 3.865832  | 1.881725  |
| H    | -0.051635 | 4.623180  | 0.609170  |
| H    | 3.255987  | 5.806352  | 1.006345  |
| H    | 0.674601  | 5.827873  | 2.487140  |
| H    | 1.294589  | 2.026305  | -5.981248 |
| H    | 0.266678  | 1.435388  | -4.631284 |
| H    | 1.202278  | 0.266371  | -5.622611 |
| H    | 4.398521  | 1.978630  | -5.773944 |
| H    | 2.142244  | 3.410112  | -2.367324 |
| H    | 4.387520  | 0.217733  | -5.412196 |
| H    | 5.222731  | 1.357354  | -4.303167 |

Table S41: B1LYP 6-311g\* **TS3** coordinates (Å).

| Atom | x         | y         | z         |
|------|-----------|-----------|-----------|
| C    | 0.533080  | 4.166009  | 1.416147  |
| C    | 0.066580  | 2.743883  | 1.596641  |
| C    | 0.555884  | 1.740226  | 0.692504  |
| C    | 1.659218  | 2.024098  | -0.112580 |
| C    | 2.276598  | 3.369100  | -0.200948 |
| C    | 2.005306  | 4.238497  | 1.019802  |
| C    | -0.027557 | 0.419942  | 0.707198  |
| C    | -0.975646 | 0.108494  | 1.721246  |
| C    | -1.374186 | 1.106969  | 2.661215  |
| C    | -0.855863 | 2.419197  | 2.557483  |
| C    | -1.538646 | -1.197038 | 1.802214  |
| C    | -1.167963 | -2.191109 | 0.856888  |
| C    | -0.237504 | -1.837708 | -0.167290 |
| C    | 0.313531  | -0.590309 | -0.243521 |
| C    | -2.475180 | -1.512320 | 2.827462  |
| C    | -3.011204 | -2.807621 | 2.890132  |
| C    | -2.641297 | -3.777375 | 1.961791  |
| C    | -1.732379 | -3.474693 | 0.954165  |
| C    | -2.316206 | 0.766160  | 3.677142  |
| C    | -2.840838 | -0.490373 | 3.759686  |
| O    | 1.507499  | 3.708563  | -1.335167 |
| O    | 2.279218  | 5.618208  | 0.793148  |
| O    | 0.289020  | 4.917826  | 2.593069  |
| O    | 2.755584  | 3.084546  | -3.309208 |
| As   | 2.672986  | 1.443643  | -3.817200 |
| O    | 2.546412  | 0.346366  | -2.561900 |
| C    | 1.163198  | 1.295295  | -5.035835 |
| C    | 4.284149  | 1.164571  | -4.865600 |
| H    | -1.200171 | 3.179995  | 3.244778  |
| H    | 0.998928  | -0.366031 | -1.052596 |
| H    | 0.028335  | -2.585788 | -0.905799 |
| H    | -1.451124 | -4.232276 | 0.231742  |
| H    | -3.065763 | -4.771785 | 2.024126  |
| H    | -3.722168 | -3.048897 | 3.671873  |
| H    | -3.553805 | -0.730301 | 4.540257  |
| H    | -2.611164 | 1.529060  | 4.387513  |
| H    | 2.064180  | 1.285585  | -0.799810 |
| H    | 3.348092  | 3.337905  | -0.423649 |
| H    | 2.606922  | 3.863581  | 1.856185  |
| H    | -0.038137 | 4.590107  | 0.578961  |
| H    | 3.219141  | 5.780140  | 0.918387  |
| H    | 0.687432  | 5.783449  | 2.441801  |
| H    | 1.265107  | 2.023697  | -5.839525 |
| H    | 0.248026  | 1.492902  | -4.478701 |
| H    | 1.124726  | 0.289229  | -5.452427 |
| H    | 4.332453  | 1.901453  | -5.666336 |
| H    | 2.101217  | 3.390131  | -2.315641 |
| H    | 4.273247  | 0.160489  | -5.288133 |
| H    | 5.147605  | 1.276545  | -4.211371 |

Table S42: BILYP 6-311+g\* **TS3** coordinates (Å).

| Atom | x         | y         | z         |
|------|-----------|-----------|-----------|
| C    | 0.535348  | 4.160832  | 1.429111  |
| C    | 0.057710  | 2.741093  | 1.608173  |
| C    | 0.555688  | 1.729065  | 0.710520  |
| C    | 1.650404  | 2.008983  | -0.093285 |
| C    | 2.269015  | 3.359197  | -0.203282 |
| C    | 2.009501  | 4.216352  | 1.034978  |
| C    | -0.030295 | 0.404107  | 0.733233  |
| C    | -0.986663 | 0.101208  | 1.740644  |
| C    | -1.394148 | 1.108036  | 2.667965  |
| C    | -0.872264 | 2.421832  | 2.560694  |
| C    | -1.550900 | -1.203048 | 1.827588  |
| C    | -1.170826 | -2.205594 | 0.895730  |
| C    | -0.230273 | -1.862676 | -0.120844 |
| C    | 0.321181  | -0.613564 | -0.201564 |
| C    | -2.497480 | -1.508974 | 2.846086  |
| C    | -3.034680 | -2.804174 | 2.915709  |
| C    | -2.655520 | -3.783493 | 2.000103  |
| C    | -1.736270 | -3.489653 | 0.999038  |
| C    | -2.345318 | 0.777954  | 3.676341  |
| C    | -2.872180 | -0.479463 | 3.764768  |
| O    | 1.560648  | 3.760631  | -1.348941 |
| O    | 2.315532  | 5.595470  | 0.835109  |
| O    | 0.288058  | 4.910796  | 2.610875  |
| O    | 2.719854  | 3.106045  | -3.374800 |
| As   | 2.675570  | 1.454915  | -3.895839 |
| O    | 2.555866  | 0.356333  | -2.635522 |
| C    | 1.175998  | 1.288451  | -5.120812 |
| C    | 4.309001  | 1.229622  | -4.916449 |
| H    | -1.224990 | 3.184118  | 3.241977  |
| H    | 1.017522  | -0.398958 | -1.002800 |
| H    | 0.046025  | -2.617106 | -0.848873 |
| H    | -1.447239 | -4.253782 | 0.286625  |
| H    | -3.080536 | -4.777268 | 2.067594  |
| H    | -3.753489 | -3.038191 | 3.692501  |
| H    | -3.593104 | -0.711363 | 4.540463  |
| H    | -2.647768 | 1.546457  | 4.377395  |
| H    | 2.046981  | 1.268850  | -0.780893 |
| H    | 3.348879  | 3.299024  | -0.388175 |
| H    | 2.608040  | 3.820065  | 1.863467  |
| H    | -0.035573 | 4.594895  | 0.597614  |
| H    | 3.261198  | 5.740148  | 0.945333  |
| H    | 0.677294  | 5.783858  | 2.474821  |
| H    | 1.268879  | 2.027934  | -5.915326 |
| H    | 0.254646  | 1.458018  | -4.565116 |
| H    | 1.168088  | 0.285639  | -5.546691 |
| H    | 4.347060  | 1.972896  | -5.711802 |
| H    | 2.144398  | 3.396215  | -2.382995 |
| H    | 4.331366  | 0.228087  | -5.344323 |
| H    | 5.156639  | 1.362416  | -4.245807 |



Table S43: B3LYP 6-311g\* **TS3** coordinates (Å).

| Atom | x         | y         | z         |
|------|-----------|-----------|-----------|
| C    | 0.531248  | 4.168748  | 1.417050  |
| C    | 0.066919  | 2.746698  | 1.597113  |
| C    | 0.556374  | 1.744605  | 0.690787  |
| C    | 1.659808  | 2.029672  | -0.114415 |
| C    | 2.277127  | 3.374933  | -0.199200 |
| C    | 2.004208  | 4.243423  | 1.021720  |
| C    | -0.027478 | 0.423658  | 0.704113  |
| C    | -0.974259 | 0.109987  | 1.719839  |
| C    | -1.371409 | 1.106904  | 2.663326  |
| C    | -0.853491 | 2.419661  | 2.560157  |
| C    | -1.537141 | -1.195450 | 1.798818  |
| C    | -1.168173 | -2.188027 | 0.849887  |
| C    | -0.239719 | -1.832785 | -0.174667 |
| C    | 0.311944  | -0.584090 | -0.248828 |
| C    | -2.472420 | -1.513251 | 2.825649  |
| C    | -3.008789 | -2.809346 | 2.885989  |
| C    | -2.640681 | -3.777159 | 1.954307  |
| C    | -1.733223 | -3.472287 | 0.945445  |
| C    | -2.310987 | 0.763823  | 3.679922  |
| C    | -2.836080 | -0.494049 | 3.760749  |
| O    | 1.505150  | 3.715656  | -1.334143 |
| O    | 2.276242  | 5.624764  | 0.796710  |
| O    | 0.284769  | 4.923098  | 2.592539  |
| O    | 2.757391  | 3.082159  | -3.307903 |
| As   | 2.672979  | 1.438664  | -3.811579 |
| O    | 2.547783  | 0.340607  | -2.553613 |
| C    | 1.161133  | 1.285626  | -5.029892 |
| C    | 4.282722  | 1.153892  | -4.863824 |
| H    | -1.196862 | 3.180564  | 3.249774  |
| H    | 0.997448  | -0.357959 | -1.059323 |
| H    | 0.025093  | -2.579974 | -0.916141 |
| H    | -1.453122 | -4.228951 | 0.219908  |
| H    | -3.065758 | -4.772631 | 2.015063  |
| H    | -3.719156 | -3.052471 | 3.669279  |
| H    | -3.548266 | -0.735926 | 4.543019  |
| H    | -2.605103 | 1.525785  | 4.393427  |
| H    | 2.066069  | 1.291065  | -0.803624 |
| H    | 3.349129  | 3.346290  | -0.424446 |
| H    | 2.606119  | 3.867349  | 1.858882  |
| H    | -0.039461 | 4.591368  | 0.576719  |
| H    | 3.216012  | 5.788880  | 0.932557  |
| H    | 0.690008  | 5.787397  | 2.439577  |
| H    | 1.262340  | 2.012599  | -5.836244 |
| H    | 0.245560  | 1.484290  | -4.472001 |
| H    | 1.123427  | 0.277408  | -5.443802 |
| H    | 4.329280  | 1.888455  | -5.668072 |
| H    | 2.094191  | 3.393551  | -2.306004 |
| H    | 4.269416  | 0.147300  | -5.282731 |
| H    | 5.148562  | 1.267713  | -4.211552 |

Table S44: B3LYP 6-311+g\* **TS3** coordinates (Å).

| Atom | x         | y         | z         |
|------|-----------|-----------|-----------|
| C    | 0.536087  | 4.164159  | 1.432566  |
| C    | 0.060615  | 2.744242  | 1.610379  |
| C    | 0.556045  | 1.735190  | 0.708799  |
| C    | 1.652065  | 2.016273  | -0.095858 |
| C    | 2.271372  | 3.365063  | -0.199580 |
| C    | 2.010203  | 4.223484  | 1.036682  |
| C    | -0.031069 | 0.410871  | 0.728139  |
| C    | -0.985045 | 0.104484  | 1.738072  |
| C    | -1.388980 | 1.108266  | 2.671323  |
| C    | -0.866803 | 2.421936  | 2.566056  |
| C    | -1.549994 | -1.199567 | 1.821345  |
| C    | -1.173783 | -2.199138 | 0.883266  |
| C    | -0.236487 | -1.852943 | -0.134794 |
| C    | 0.316415  | -0.603134 | -0.211791 |
| C    | -2.493928 | -1.509291 | 2.842401  |
| C    | -3.032154 | -2.805044 | 2.908058  |
| C    | -2.656853 | -3.780823 | 1.986599  |
| C    | -1.740474 | -3.483534 | 0.983272  |
| C    | -2.336676 | 0.774513  | 3.681448  |
| C    | -2.864560 | -0.483825 | 3.766653  |
| O    | 1.551552  | 3.758062  | -1.344657 |
| O    | 2.311382  | 5.604323  | 0.833738  |
| O    | 0.288404  | 4.915254  | 2.614384  |
| O    | 2.709566  | 3.101663  | -3.372919 |
| As   | 2.675529  | 1.446335  | -3.886530 |
| O    | 2.565932  | 0.349586  | -2.620574 |
| C    | 1.174086  | 1.262046  | -5.109091 |
| C    | 4.308565  | 1.225216  | -4.911576 |
| H    | -1.217025 | 3.183666  | 3.251249  |
| H    | 1.011616  | -0.385559 | -1.015215 |
| H    | 0.036805  | -2.605312 | -0.867830 |
| H    | -1.454268 | -4.245624 | 0.265791  |
| H    | -3.082998 | -4.775562 | 2.051279  |
| H    | -3.749281 | -3.041959 | 3.687143  |
| H    | -3.583645 | -0.718754 | 4.544763  |
| H    | -2.636645 | 1.541070  | 4.387534  |
| H    | 2.049502  | 1.276588  | -0.786113 |
| H    | 3.350980  | 3.310668  | -0.391674 |
| H    | 2.611459  | 3.829443  | 1.865750  |
| H    | -0.036105 | 4.597863  | 0.599753  |
| H    | 3.256535  | 5.753896  | 0.955828  |
| H    | 0.681246  | 5.788448  | 2.476080  |
| H    | 1.260474  | 1.998769  | -5.908183 |
| H    | 0.251789  | 1.427785  | -4.552015 |
| H    | 1.173442  | 0.256017  | -5.529802 |
| H    | 4.338790  | 1.964529  | -5.712225 |
| H    | 2.129375  | 3.394335  | -2.370351 |
| H    | 4.335852  | 0.220269  | -5.333518 |
| H    | 5.157963  | 1.367992  | -4.243735 |

Table S45: BPW91 6-311g\* BPDE coordinates (Å).

| Atom | x         | y         | z         |
|------|-----------|-----------|-----------|
| C    | -1.741332 | 0.782002  | -0.163064 |
| C    | -0.669341 | 1.673722  | -0.148745 |
| C    | 0.662042  | 1.198808  | -0.064202 |
| C    | 0.914455  | -0.201645 | -0.029772 |
| C    | 2.239598  | -0.768014 | 0.014313  |
| C    | 2.446364  | -2.121009 | 0.057754  |
| C    | 1.352882  | -3.050555 | 0.065309  |
| C    | 1.545865  | -4.446493 | 0.116862  |
| C    | 0.452472  | -5.318059 | 0.117290  |
| C    | -0.852887 | -4.819899 | 0.064162  |
| C    | -1.095752 | -3.431168 | 0.009392  |
| C    | -2.425056 | -2.888089 | -0.048639 |
| C    | -2.635180 | -1.536286 | -0.102201 |
| C    | -1.536784 | -0.609572 | -0.100903 |
| C    | -0.197825 | -1.114520 | -0.039738 |
| C    | 0.019806  | -2.527336 | 0.011347  |
| C    | 1.768232  | 2.192351  | 0.038820  |
| C    | 1.472922  | 3.601940  | 0.374985  |
| C    | 0.036101  | 3.995890  | 0.604304  |
| C    | -0.918297 | 3.162596  | -0.271253 |
| O    | 1.837947  | 3.245596  | -0.982379 |
| O    | -0.221481 | 5.397782  | 0.397461  |
| O    | -2.272196 | 3.476521  | 0.059887  |
| H    | -2.757356 | 1.174623  | -0.216765 |
| H    | 3.110026  | -0.112579 | -0.003193 |
| H    | 3.465902  | -2.513544 | 0.083634  |
| H    | 2.563407  | -4.842435 | 0.156296  |
| H    | 0.619072  | -6.396502 | 0.158516  |
| H    | -1.701518 | -5.508195 | 0.064287  |
| H    | -3.272205 | -3.578354 | -0.050250 |
| H    | -3.651398 | -1.137209 | -0.147817 |
| H    | 2.755756  | 1.825009  | 0.319743  |
| H    | 2.230228  | 4.185939  | 0.909275  |
| H    | -0.214661 | 3.821817  | 1.662990  |
| H    | -0.719618 | 3.451711  | -1.323137 |
| H    | 0.085440  | 5.626005  | -0.499346 |
| H    | -2.305456 | 4.451854  | 0.074952  |

Table S46: BPW91 6-311+g\* BPDE coordinates (Å).

| Atom | x         | y         | z         |
|------|-----------|-----------|-----------|
| C    | -1.744336 | 0.780231  | -0.149142 |
| C    | -0.673186 | 1.674199  | -0.129131 |
| C    | 0.657803  | 1.198584  | -0.043362 |
| C    | 0.911933  | -0.202196 | -0.016014 |
| C    | 2.237898  | -0.767039 | 0.024693  |
| C    | 2.446065  | -2.120622 | 0.061251  |
| C    | 1.353311  | -3.051237 | 0.064344  |
| C    | 1.547967  | -4.447561 | 0.108332  |
| C    | 0.455090  | -5.320447 | 0.103169  |
| C    | -0.851124 | -4.822871 | 0.051650  |
| C    | -1.094873 | -3.433750 | 0.004220  |
| C    | -2.424819 | -2.891470 | -0.052659 |
| C    | -2.636124 | -1.539117 | -0.100062 |
| C    | -1.537936 | -0.611605 | -0.092071 |
| C    | -0.198976 | -1.115973 | -0.031199 |
| C    | 0.019852  | -2.529082 | 0.012353  |
| C    | 1.766425  | 2.187304  | 0.057410  |
| C    | 1.477827  | 3.602005  | 0.370971  |
| C    | 0.044251  | 4.012517  | 0.589721  |
| C    | -0.924958 | 3.164198  | -0.255822 |
| O    | 1.853057  | 3.228068  | -0.980087 |
| O    | -0.193917 | 5.413921  | 0.346776  |
| O    | -2.279664 | 3.470369  | 0.096770  |
| H    | -2.761831 | 1.168816  | -0.204771 |
| H    | 3.108140  | -0.111138 | 0.010563  |
| H    | 3.466270  | -2.512062 | 0.084645  |
| H    | 2.566005  | -4.842906 | 0.146079  |
| H    | 0.622627  | -6.399130 | 0.138438  |
| H    | -1.699203 | -5.512129 | 0.047044  |
| H    | -3.271678 | -3.582334 | -0.059119 |
| H    | -3.652921 | -1.141051 | -0.145326 |
| H    | 2.749437  | 1.819555  | 0.352623  |
| H    | 2.235789  | 4.186007  | 0.904285  |
| H    | -0.197416 | 3.873215  | 1.655520  |
| H    | -0.759211 | 3.443820  | -1.315256 |
| H    | 0.124100  | 5.630278  | -0.549935 |
| H    | -2.351505 | 4.443338  | 0.063276  |

Table S47: BLYP 6-311g\* BPDE coordinates (Å).

| Atom | x         | y         | z         |
|------|-----------|-----------|-----------|
| C    | -1.746417 | 0.781985  | -0.155433 |
| C    | -0.672748 | 1.676827  | -0.138534 |
| C    | 0.663199  | 1.201098  | -0.054440 |
| C    | 0.917309  | -0.203721 | -0.022360 |
| C    | 2.246588  | -0.773453 | 0.022045  |
| C    | 2.453494  | -2.128991 | 0.062272  |
| C    | 1.357502  | -3.062566 | 0.065553  |
| C    | 1.550100  | -4.462372 | 0.113049  |
| C    | 0.454133  | -5.336052 | 0.109318  |
| C    | -0.854538 | -4.837129 | 0.056168  |
| C    | -1.099196 | -3.444914 | 0.005525  |
| C    | -2.432223 | -2.898677 | -0.052552 |
| C    | -2.642844 | -1.544346 | -0.102058 |
| C    | -1.541858 | -0.613337 | -0.096678 |
| C    | -0.198589 | -1.120103 | -0.035560 |
| C    | 0.019964  | -2.537657 | 0.011637  |
| C    | 1.774530  | 2.197853  | 0.049688  |
| C    | 1.482711  | 3.615195  | 0.376139  |
| C    | 0.041352  | 4.018585  | 0.599368  |
| C    | -0.924798 | 3.173674  | -0.265039 |
| O    | 1.853537  | 3.254376  | -0.991251 |
| O    | -0.207696 | 5.430274  | 0.371188  |
| O    | -2.286495 | 3.486359  | 0.085849  |
| H    | -2.762121 | 1.173600  | -0.209774 |
| H    | 3.116478  | -0.118199 | 0.007862  |
| H    | 3.472889  | -2.521419 | 0.089112  |
| H    | 2.567129  | -4.859104 | 0.152501  |
| H    | 0.620921  | -6.414438 | 0.147206  |
| H    | -1.702263 | -5.526241 | 0.053045  |
| H    | -3.279364 | -3.588677 | -0.057467 |
| H    | -3.658983 | -1.145530 | -0.147588 |
| H    | 2.760601  | 1.829299  | 0.329823  |
| H    | 2.238154  | 4.203828  | 0.907239  |
| H    | -0.210872 | 3.866725  | 1.660470  |
| H    | -0.746489 | 3.461335  | -1.319301 |
| H    | 0.099619  | 5.645277  | -0.531837 |
| H    | -2.332550 | 4.463340  | 0.074993  |

Table S48: BLYP 6-311+g\* BPDE coordinates (Å).

| Atom | x         | y         | z         |
|------|-----------|-----------|-----------|
| C    | -1.749712 | 0.780283  | -0.139396 |
| C    | -0.677080 | 1.677980  | -0.114637 |
| C    | 0.658498  | 1.201198  | -0.029408 |
| C    | 0.914517  | -0.204242 | -0.006148 |
| C    | 2.244823  | -0.772259 | 0.034610  |
| C    | 2.453368  | -2.128657 | 0.066529  |
| C    | 1.358111  | -3.063406 | 0.064004  |
| C    | 1.552709  | -4.463760 | 0.102623  |
| C    | 0.457178  | -5.338984 | 0.092475  |
| C    | -0.852624 | -4.840611 | 0.041272  |
| C    | -1.098151 | -3.447816 | -0.000834 |
| C    | -2.431993 | -2.902463 | -0.057615 |
| C    | -2.643939 | -1.547315 | -0.099928 |
| C    | -1.543024 | -0.615454 | -0.086712 |
| C    | -0.199771 | -1.121652 | -0.025849 |
| C    | 0.020119  | -2.539644 | 0.012475  |
| C    | 1.772441  | 2.191827  | 0.073051  |
| C    | 1.489013  | 3.614775  | 0.371632  |
| C    | 0.051812  | 4.038249  | 0.581507  |
| C    | -0.933153 | 3.176224  | -0.245566 |
| O    | 1.872782  | 3.233408  | -0.989030 |
| O    | -0.173185 | 5.449148  | 0.309434  |
| O    | -2.294870 | 3.479702  | 0.136102  |
| H    | -2.766990 | 1.166963  | -0.196471 |
| H    | 3.114494  | -0.116782 | 0.025574  |
| H    | 3.473362  | -2.519646 | 0.090714  |
| H    | 2.570100  | -4.859742 | 0.140067  |
| H    | 0.624963  | -6.417420 | 0.123482  |
| H    | -1.699590 | -5.530608 | 0.032771  |
| H    | -3.278715 | -3.592889 | -0.068080 |
| H    | -3.660567 | -1.149806 | -0.145047 |
| H    | 2.753188  | 1.822924  | 0.369411  |
| H    | 2.245256  | 4.203213  | 0.901203  |
| H    | -0.189403 | 3.928348  | 1.649962  |
| H    | -0.797798 | 3.452424  | -1.308084 |
| H    | 0.146472  | 5.649240  | -0.593571 |
| H    | -2.392474 | 4.449955  | 0.057656  |

Table S49: B1LYP 6-311g\* BPDE coordinates (Å).

| Atom | x         | y         | z         |
|------|-----------|-----------|-----------|
| C    | -1.733016 | 0.776024  | -0.154713 |
| C    | -0.666335 | 1.663859  | -0.137112 |
| C    | 0.657226  | 1.189831  | -0.055949 |
| C    | 0.908197  | -0.201385 | -0.020669 |
| C    | 2.233469  | -0.768334 | 0.027396  |
| C    | 2.437783  | -2.110026 | 0.068297  |
| C    | 1.345069  | -3.039771 | 0.068500  |
| C    | 1.538272  | -4.427556 | 0.115692  |
| C    | 0.450437  | -5.295576 | 0.109329  |
| C    | -0.848620 | -4.799594 | 0.054058  |
| C    | -1.088956 | -3.418547 | 0.004062  |
| C    | -2.417551 | -2.875148 | -0.056071 |
| C    | -2.625927 | -1.534620 | -0.105130 |
| C    | -1.528082 | -0.607585 | -0.097669 |
| C    | -0.197405 | -1.109386 | -0.035160 |
| C    | 0.019936  | -2.520148 | 0.012409  |
| C    | 1.764326  | 2.184183  | 0.037537  |
| C    | 1.472928  | 3.585909  | 0.367732  |
| C    | 0.041988  | 3.987181  | 0.596644  |
| C    | -0.918794 | 3.151728  | -0.258767 |
| O    | 1.824831  | 3.222300  | -0.979320 |
| O    | -0.197186 | 5.378551  | 0.368118  |
| O    | -2.261527 | 3.453275  | 0.096613  |
| H    | -2.741294 | 1.164779  | -0.207614 |
| H    | 3.096525  | -0.117560 | 0.016888  |
| H    | 3.448972  | -2.500968 | 0.098356  |
| H    | 2.547883  | -4.820998 | 0.156995  |
| H    | 0.615966  | -6.366011 | 0.146853  |
| H    | -1.690391 | -5.483246 | 0.048786  |
| H    | -3.257454 | -3.561211 | -0.062404 |
| H    | -3.633891 | -1.137321 | -0.151788 |
| H    | 2.744778  | 1.818392  | 0.308580  |
| H    | 2.225073  | 4.174291  | 0.885789  |
| H    | -0.203102 | 3.830914  | 1.650255  |
| H    | -0.749020 | 3.438241  | -1.305470 |
| H    | 0.110609  | 5.603248  | -0.518350 |
| H    | -2.335544 | 4.414992  | 0.077472  |

Table S50: B1LYP 6-311+g\* BPDE coordinates (Å).

| Atom | x         | y         | z         |
|------|-----------|-----------|-----------|
| C    | -1.735780 | 0.774781  | -0.142433 |
| C    | -0.669759 | 1.664851  | -0.119406 |
| C    | 0.653489  | 1.190028  | -0.037391 |
| C    | 0.905972  | -0.201710 | -0.009130 |
| C    | 2.232096  | -0.767301 | 0.035426  |
| C    | 2.437731  | -2.109843 | 0.070073  |
| C    | 1.345561  | -3.040459 | 0.066758  |
| C    | 1.540408  | -4.428744 | 0.107637  |
| C    | 0.452847  | -5.298063 | 0.097123  |
| C    | -0.847210 | -4.802455 | 0.043640  |
| C    | -1.088221 | -3.420880 | -0.000328 |
| C    | -2.417499 | -2.878244 | -0.059134 |
| C    | -2.626954 | -1.536921 | -0.103039 |
| C    | -1.529146 | -0.609218 | -0.090061 |
| C    | -0.198401 | -1.110588 | -0.028285 |
| C    | 0.020010  | -2.521709 | 0.012824  |
| C    | 1.762989  | 2.179503  | 0.055534  |
| C    | 1.477973  | 3.585680  | 0.365121  |
| C    | 0.049911  | 4.002428  | 0.583744  |
| C    | -0.925178 | 3.153871  | -0.244411 |
| O    | 1.840634  | 3.206296  | -0.976272 |
| O    | -0.171571 | 5.392856  | 0.323549  |
| O    | -2.267367 | 3.448849  | 0.131754  |
| H    | -2.745364 | 1.159726  | -0.197001 |
| H    | 3.095055  | -0.116411 | 0.027845  |
| H    | 3.449458  | -2.499665 | 0.097402  |
| H    | 2.550350  | -4.821633 | 0.147136  |
| H    | 0.619174  | -6.368555 | 0.129761  |
| H    | -1.688405 | -5.486847 | 0.034870  |
| H    | -3.257128 | -3.564645 | -0.069237 |
| H    | -3.635395 | -1.140716 | -0.149062 |
| H    | 2.738840  | 1.812772  | 0.340580  |
| H    | 2.230686  | 4.173122  | 0.883147  |
| H    | -0.186402 | 3.877132  | 1.643256  |
| H    | -0.785469 | 3.431408  | -1.297302 |
| H    | 0.145146  | 5.609761  | -0.562580 |
| H    | -2.382911 | 4.404247  | 0.058066  |



Table S51: B3LYP 6-311g\* BPDE coordinates (Å).

| Atom | x         | y         | z         |
|------|-----------|-----------|-----------|
| C    | -1.733640 | 0.776538  | -0.155644 |
| C    | -0.666568 | 1.664563  | -0.138635 |
| C    | 0.657737  | 1.190638  | -0.057073 |
| C    | 0.908912  | -0.201505 | -0.021953 |
| C    | 2.233346  | -0.767991 | 0.025625  |
| C    | 2.438024  | -2.111042 | 0.066872  |
| C    | 1.345904  | -3.040262 | 0.068014  |
| C    | 1.538859  | -4.428809 | 0.115768  |
| C    | 0.450639  | -5.297025 | 0.110307  |
| C    | -0.848871 | -4.800982 | 0.055351  |
| C    | -1.089718 | -3.419309 | 0.004729  |
| C    | -2.417600 | -2.876221 | -0.055044 |
| C    | -2.626230 | -1.534336 | -0.104651 |
| C    | -1.529045 | -0.607808 | -0.098050 |
| C    | -0.197426 | -1.109997 | -0.035806 |
| C    | 0.019878  | -2.520266 | 0.012202  |
| C    | 1.764230  | 2.184303  | 0.037703  |
| C    | 1.472464  | 3.587026  | 0.368585  |
| C    | 0.041266  | 3.987123  | 0.597211  |
| C    | -0.918549 | 3.151889  | -0.260262 |
| O    | 1.826705  | 3.224658  | -0.979682 |
| O    | -0.200773 | 5.379585  | 0.371564  |
| O    | -2.262499 | 3.455522  | 0.091673  |
| H    | -2.742908 | 1.166149  | -0.208465 |
| H    | 3.097410  | -0.116507 | 0.014219  |
| H    | 3.450396  | -2.502151 | 0.096456  |
| H    | 2.549576  | -4.822577 | 0.156820  |
| H    | 0.616338  | -6.368554 | 0.148321  |
| H    | -1.691560 | -5.485322 | 0.050805  |
| H    | -3.258537 | -3.562839 | -0.060744 |
| H    | -3.635378 | -1.136873 | -0.151114 |
| H    | 2.745557  | 1.818205  | 0.310576  |
| H    | 2.225122  | 4.174663  | 0.889418  |
| H    | -0.204691 | 3.828466  | 1.651577  |
| H    | -0.744656 | 3.438853  | -1.307751 |
| H    | 0.106837  | 5.605145  | -0.516714 |
| H    | -2.330382 | 4.419752  | 0.077969  |

Table S52: B3LYP 6-311+g\* BPDE coordinates (Å).

| Atom | x         | y         | z         |
|------|-----------|-----------|-----------|
| C    | -1.749712 | 0.780283  | -0.139396 |
| C    | -0.677080 | 1.677980  | -0.114637 |
| C    | 0.658498  | 1.201198  | -0.029408 |
| C    | 0.914517  | -0.204242 | -0.006148 |
| C    | 2.244823  | -0.772259 | 0.034610  |
| C    | 2.453368  | -2.128657 | 0.066529  |
| C    | 1.358111  | -3.063406 | 0.064004  |
| C    | 1.552709  | -4.463760 | 0.102623  |
| C    | 0.457178  | -5.338984 | 0.092475  |
| C    | -0.852624 | -4.840611 | 0.041272  |
| C    | -1.098151 | -3.447816 | -0.000834 |
| C    | -2.431993 | -2.902463 | -0.057615 |
| C    | -2.643939 | -1.547315 | -0.099928 |
| C    | -1.543024 | -0.615454 | -0.086712 |
| C    | -0.199771 | -1.121652 | -0.025849 |
| C    | 0.020119  | -2.539644 | 0.012475  |
| C    | 1.772441  | 2.191827  | 0.073051  |
| C    | 1.489013  | 3.614775  | 0.371632  |
| C    | 0.051812  | 4.038249  | 0.581507  |
| C    | -0.933153 | 3.176224  | -0.245566 |
| O    | 1.872782  | 3.233408  | -0.989030 |
| O    | -0.173185 | 5.449148  | 0.309434  |
| O    | -2.294870 | 3.479702  | 0.136102  |
| H    | -2.766990 | 1.166963  | -0.196471 |
| H    | 3.114494  | -0.116782 | 0.025574  |
| H    | 3.473362  | -2.519646 | 0.090714  |
| H    | 2.570100  | -4.859742 | 0.140067  |
| H    | 0.624963  | -6.417420 | 0.123482  |
| H    | -1.699590 | -5.530608 | 0.032771  |
| H    | -3.278715 | -3.592889 | -0.068080 |
| H    | -3.660567 | -1.149806 | -0.145047 |
| H    | 2.753188  | 1.822924  | 0.369411  |
| H    | 2.245256  | 4.203213  | 0.901203  |
| H    | -0.189403 | 3.928348  | 1.649962  |
| H    | -0.797798 | 3.452424  | -1.308084 |
| H    | 0.146472  | 5.649240  | -0.593571 |
| H    | -2.392474 | 4.449955  | 0.057656  |

Table S53: BPW91 6-311g\* Tetrol coordinates (Å).

| Atom | x         | y         | z         |
|------|-----------|-----------|-----------|
| C    | 12.422420 | 0.761389  | 1.400775  |
| C    | 11.881851 | -0.427734 | 1.897763  |
| C    | 12.717584 | -1.467784 | 2.319099  |
| C    | 14.120220 | -1.338771 | 2.254392  |
| C    | 15.007792 | -2.389132 | 2.676545  |
| C    | 16.366458 | -2.240218 | 2.605867  |
| C    | 16.959516 | -1.026557 | 2.110730  |
| C    | 18.350770 | -0.848090 | 2.047212  |
| C    | 18.918684 | 0.343126  | 1.576021  |
| C    | 20.426334 | 0.491908  | 1.633985  |
| C    | 20.955321 | 1.525513  | 0.645103  |
| C    | 20.199503 | 2.847242  | 0.789195  |
| C    | 18.691668 | 2.671486  | 0.541550  |
| C    | 18.097069 | 1.398501  | 1.125503  |
| C    | 16.678942 | 1.253253  | 1.173659  |
| C    | 15.778337 | 2.286812  | 0.730998  |
| C    | 14.418286 | 2.136988  | 0.804769  |
| C    | 13.820105 | 0.937097  | 1.316859  |
| C    | 14.685304 | -0.119749 | 1.749755  |
| C    | 16.104820 | 0.039247  | 1.677327  |
| O    | 21.054522 | -0.779003 | 1.419689  |
| O    | 22.349753 | 1.694129  | 0.981646  |
| O    | 20.379942 | 3.375386  | 2.110592  |
| H    | 11.763117 | 1.567725  | 1.070726  |
| H    | 10.797958 | -0.547388 | 1.956573  |
| H    | 12.285599 | -2.394783 | 2.703985  |
| H    | 14.573973 | -3.316674 | 3.058220  |
| H    | 17.027924 | -3.047062 | 2.931052  |
| H    | 19.011391 | -1.651143 | 2.377206  |
| H    | 20.685671 | 0.859776  | 2.646146  |
| H    | 20.852250 | 1.132585  | -0.381168 |
| H    | 20.568449 | 3.568010  | 0.036003  |
| H    | 18.205173 | 3.553040  | 0.987160  |
| H    | 16.189064 | 3.199155  | 0.301122  |
| H    | 13.763044 | 2.942563  | 0.463654  |
| H    | 22.011221 | -0.595918 | 1.457842  |
| H    | 22.807823 | 2.071090  | 0.211099  |
| O    | 18.413405 | 2.770710  | -0.875928 |
| H    | 18.481483 | 1.876662  | -1.254556 |
| H    | 21.335113 | 3.289931  | 2.294678  |

Table S54: BPW91 6-311+g\* Tetrol coordinates ( $\text{\AA}$ ).

| Atom | x         | y         | z         |
|------|-----------|-----------|-----------|
| C    | 12.421511 | 0.768684  | 1.412878  |
| C    | 11.881192 | -0.420772 | 1.910530  |
| C    | 12.717887 | -1.461884 | 2.328841  |
| C    | 14.120670 | -1.333532 | 2.259789  |
| C    | 15.008328 | -2.384483 | 2.680651  |
| C    | 16.367344 | -2.236777 | 2.605948  |
| C    | 16.959533 | -1.024457 | 2.105688  |
| C    | 18.351232 | -0.848699 | 2.038035  |
| C    | 18.921102 | 0.337057  | 1.554451  |
| C    | 20.432175 | 0.477027  | 1.606950  |
| C    | 20.969018 | 1.546185  | 0.659461  |
| C    | 20.189070 | 2.854190  | 0.806897  |
| C    | 18.695133 | 2.653728  | 0.504024  |
| C    | 18.098278 | 1.392398  | 1.104525  |
| C    | 16.679396 | 1.254563  | 1.167108  |
| C    | 15.777434 | 2.292131  | 0.736639  |
| C    | 14.416960 | 2.144692  | 0.816933  |
| C    | 13.819435 | 0.942713  | 1.324641  |
| C    | 14.685291 | -0.115345 | 1.752733  |
| C    | 16.104957 | 0.041642  | 1.673639  |
| O    | 21.045154 | -0.796289 | 1.336323  |
| O    | 22.357095 | 1.727121  | 1.019489  |
| O    | 20.301530 | 3.372435  | 2.142113  |
| H    | 11.761825 | 1.576457  | 1.086562  |
| H    | 10.797234 | -0.539652 | 1.972631  |
| H    | 12.286322 | -2.388799 | 2.714899  |
| H    | 14.574882 | -3.311297 | 3.064960  |
| H    | 17.028886 | -3.043929 | 2.930672  |
| H    | 19.008592 | -1.651958 | 2.374260  |
| H    | 20.704288 | 0.786870  | 2.634477  |
| H    | 20.895117 | 1.183117  | -0.380079 |
| H    | 20.574377 | 3.594324  | 0.082481  |
| H    | 18.181722 | 3.543872  | 0.897239  |
| H    | 16.182243 | 3.215271  | 0.323049  |
| H    | 13.761872 | 2.954489  | 0.485226  |
| H    | 22.006722 | -0.654342 | 1.417858  |
| H    | 22.833467 | 2.104672  | 0.259405  |
| O    | 18.477976 | 2.702182  | -0.930554 |
| H    | 18.511127 | 1.792045  | -1.276326 |
| H    | 21.251481 | 3.357668  | 2.367803  |

Table S55: BLYP 6-311g\* Tetrol coordinates (Å).

| Atom | x         | y         | z         |
|------|-----------|-----------|-----------|
| C    | 12.404382 | 0.758633  | 1.404444  |
| C    | 11.863802 | -0.431886 | 1.907311  |
| C    | 12.702313 | -1.473451 | 2.330798  |
| C    | 14.108393 | -1.345332 | 2.262649  |
| C    | 15.000762 | -2.397286 | 2.686986  |
| C    | 16.361512 | -2.248275 | 2.613035  |
| C    | 16.956895 | -1.032521 | 2.111759  |
| C    | 18.351174 | -0.853957 | 2.044714  |
| C    | 18.920987 | 0.338611  | 1.569168  |
| C    | 20.437306 | 0.485194  | 1.627310  |
| C    | 20.973703 | 1.532513  | 0.646649  |
| C    | 20.211657 | 2.858460  | 0.789956  |
| C    | 18.696869 | 2.680491  | 0.541672  |
| C    | 18.097199 | 1.397571  | 1.117745  |
| C    | 16.674192 | 1.252653  | 1.165988  |
| C    | 15.767717 | 2.287111  | 0.719783  |
| C    | 14.405510 | 2.136511  | 0.796972  |
| C    | 13.805352 | 0.935341  | 1.316235  |
| C    | 14.674606 | -0.123674 | 1.751555  |
| C    | 16.098708 | 0.035762  | 1.675472  |
| O    | 21.063011 | -0.796529 | 1.389165  |
| O    | 22.376447 | 1.703885  | 0.996963  |
| O    | 20.386395 | 3.390902  | 2.123022  |
| H    | 11.743798 | 1.563415  | 1.073739  |
| H    | 10.780176 | -0.551230 | 1.968951  |
| H    | 12.270264 | -2.398734 | 2.719182  |
| H    | 14.567913 | -3.323677 | 3.072078  |
| H    | 17.023461 | -3.054125 | 2.939119  |
| H    | 19.011329 | -1.656710 | 2.374448  |
| H    | 20.704613 | 0.831066  | 2.643392  |
| H    | 20.883810 | 1.147321  | -0.382686 |
| H    | 20.582007 | 3.582591  | 0.042619  |
| H    | 18.208663 | 3.559688  | 0.986588  |
| H    | 16.176263 | 3.195810  | 0.282328  |
| H    | 13.749795 | 2.940398  | 0.453259  |
| H    | 22.023474 | -0.623764 | 1.440457  |
| H    | 22.841830 | 2.082834  | 0.228343  |
| O    | 18.421032 | 2.795298  | -0.888809 |
| H    | 18.486137 | 1.903310  | -1.279608 |
| H    | 21.344401 | 3.319103  | 2.310100  |

Table S56: BLYP 6-311+g\* Tetrol coordinates (Å).

| Atom | x         | y         | z         |
|------|-----------|-----------|-----------|
| C    | 12.403012 | 0.764988  | 1.415947  |
| C    | 11.863053 | -0.426493 | 1.919039  |
| C    | 12.703129 | -1.468407 | 2.340850  |
| C    | 14.109485 | -1.339579 | 2.269807  |
| C    | 15.002364 | -2.391066 | 2.694891  |
| C    | 16.363672 | -2.242119 | 2.618215  |
| C    | 16.957568 | -1.027921 | 2.110170  |
| C    | 18.352414 | -0.851921 | 2.038350  |
| C    | 18.924261 | 0.333211  | 1.545289  |
| C    | 20.444907 | 0.467893  | 1.593273  |
| C    | 20.989931 | 1.558754  | 0.664042  |
| C    | 20.197984 | 2.867593  | 0.809930  |
| C    | 18.700330 | 2.659429  | 0.495389  |
| C    | 18.098482 | 1.391425  | 1.093440  |
| C    | 16.674604 | 1.255345  | 1.160425  |
| C    | 15.766157 | 2.294285  | 0.728501  |
| C    | 14.403323 | 2.145444  | 0.811879  |
| C    | 13.804355 | 0.940981  | 1.324788  |
| C    | 14.674750 | -0.118572 | 1.756058  |
| C    | 16.099091 | 0.039671  | 1.673712  |
| O    | 21.050524 | -0.815654 | 1.280941  |
| O    | 22.384361 | 1.747105  | 1.045072  |
| O    | 20.291640 | 3.387898  | 2.159621  |
| H    | 11.741859 | 1.570593  | 1.088474  |
| H    | 10.779591 | -0.545985 | 1.982734  |
| H    | 12.271986 | -2.393689 | 2.730210  |
| H    | 14.570450 | -3.316550 | 3.083101  |
| H    | 17.025795 | -3.047339 | 2.945307  |
| H    | 19.008636 | -1.653983 | 2.377369  |
| H    | 20.730287 | 0.740076  | 2.625642  |
| H    | 20.937134 | 1.209379  | -0.379921 |
| H    | 20.587346 | 3.615100  | 0.097942  |
| H    | 18.179655 | 3.549088  | 0.874914  |
| H    | 16.167254 | 3.217152  | 0.313028  |
| H    | 13.747687 | 2.954023  | 0.479402  |
| H    | 22.015669 | -0.696850 | 1.384286  |
| H    | 22.872864 | 2.123788  | 0.288739  |
| O    | 18.499347 | 2.709990  | -0.956650 |
| H    | 18.521420 | 1.798436  | -1.307153 |
| H    | 21.241486 | 3.397801  | 2.395796  |

Table S57: B1LYP 6-311g\* Tetrol coordinates (Å).

| Atom | x         | y         | z         |
|------|-----------|-----------|-----------|
| C    | 12.444928 | 0.755930  | 1.392443  |
| C    | 11.907006 | -0.425017 | 1.892668  |
| C    | 12.739563 | -1.456844 | 2.319710  |
| C    | 14.133605 | -1.326451 | 2.256642  |
| C    | 15.021768 | -2.372871 | 2.686758  |
| C    | 16.368756 | -2.224498 | 2.618002  |
| C    | 16.962094 | -1.013887 | 2.115844  |
| C    | 18.344980 | -0.838787 | 2.051094  |
| C    | 18.910699 | 0.343757  | 1.574189  |
| C    | 20.418463 | 0.484533  | 1.620467  |
| C    | 20.941321 | 1.526986  | 0.644804  |
| C    | 20.187298 | 2.841267  | 0.806944  |
| C    | 18.686749 | 2.667881  | 0.550543  |
| C    | 18.092487 | 1.391923  | 1.125807  |
| C    | 16.682578 | 1.247319  | 1.171879  |
| C    | 15.781411 | 2.277872  | 0.722585  |
| C    | 14.432790 | 2.127522  | 0.793961  |
| C    | 13.834903 | 0.930490  | 1.311035  |
| C    | 14.694882 | -0.117034 | 1.748495  |
| C    | 16.112071 | 0.042605  | 1.677398  |
| O    | 21.027871 | -0.780243 | 1.372208  |
| O    | 22.329105 | 1.691273  | 0.963934  |
| O    | 20.351898 | 3.344812  | 2.130632  |
| H    | 11.790105 | 1.553502  | 1.059298  |
| H    | 10.831264 | -0.544578 | 1.949629  |
| H    | 12.310537 | -2.374780 | 2.706315  |
| H    | 14.590148 | -3.290919 | 3.070335  |
| H    | 17.026455 | -3.021949 | 2.946233  |
| H    | 18.999576 | -1.635655 | 2.379956  |
| H    | 20.693581 | 0.821900  | 2.627552  |
| H    | 20.829608 | 1.149716  | -0.376817 |
| H    | 20.558196 | 3.570746  | 0.078049  |
| H    | 18.201219 | 3.537402  | 0.997077  |
| H    | 16.188957 | 3.181576  | 0.293230  |
| H    | 13.781206 | 2.923434  | 0.449564  |
| H    | 21.979687 | -0.633336 | 1.420460  |
| H    | 22.787231 | 2.069555  | 0.206554  |
| O    | 18.422015 | 2.774996  | -0.858568 |
| H    | 18.465069 | 1.897182  | -1.252498 |
| H    | 21.295783 | 3.305991  | 2.328439  |

Table S58: B1LYP 6-311+g\* Tetrol coordinates (Å).

| Atom | x         | y         | z         |
|------|-----------|-----------|-----------|
| C    | 12.443472 | 0.760599  | 1.402170  |
| C    | 11.906043 | -0.420981 | 1.903187  |
| C    | 12.740006 | -1.453346 | 2.328294  |
| C    | 14.134338 | -1.322735 | 2.261772  |
| C    | 15.022875 | -2.369212 | 2.691472  |
| C    | 16.370458 | -2.221315 | 2.619361  |
| C    | 16.962537 | -1.011828 | 2.112030  |
| C    | 18.345921 | -0.838895 | 2.042942  |
| C    | 18.913017 | 0.338861  | 1.554461  |
| C    | 20.423872 | 0.471825  | 1.595798  |
| C    | 20.954300 | 1.546239  | 0.657478  |
| C    | 20.178214 | 2.848248  | 0.822856  |
| C    | 18.689668 | 2.653162  | 0.517425  |
| C    | 18.093398 | 1.386969  | 1.106869  |
| C    | 16.682752 | 1.248554  | 1.166323  |
| C    | 15.779928 | 2.282381  | 0.727668  |
| C    | 14.430643 | 2.133552  | 0.804475  |
| C    | 13.833829 | 0.934257  | 1.317518  |
| C    | 14.694840 | -0.113857 | 1.751313  |
| C    | 16.112261 | 0.044620  | 1.674559  |
| O    | 21.019683 | -0.793540 | 1.297888  |
| O    | 22.336510 | 1.722618  | 0.998556  |
| O    | 20.284047 | 3.342292  | 2.158358  |
| H    | 11.788085 | 1.558928  | 1.071869  |
| H    | 10.830407 | -0.540370 | 1.962656  |
| H    | 12.311739 | -2.371173 | 2.716095  |
| H    | 14.592027 | -3.286533 | 3.077695  |
| H    | 17.028315 | -3.018643 | 2.947578  |
| H    | 18.997679 | -1.635536 | 2.378016  |
| H    | 20.709194 | 0.758367  | 2.615187  |
| H    | 20.869707 | 1.196220  | -0.375956 |
| H    | 20.562682 | 3.594545  | 0.119748  |
| H    | 18.180230 | 3.530466  | 0.917663  |
| H    | 16.181587 | 3.196209  | 0.313274  |
| H    | 13.778993 | 2.932957  | 0.468394  |
| H    | 21.974557 | -0.688468 | 1.389708  |
| H    | 22.814446 | 2.093295  | 0.248720  |
| O    | 18.480083 | 2.715462  | -0.907063 |
| H    | 18.484767 | 1.824037  | -1.273791 |
| H    | 21.220754 | 3.375087  | 2.390286  |



Table S59: B3LYP 6-311g\* Tetrol coordinates (Å).

| Atom | x         | y         | z         |
|------|-----------|-----------|-----------|
| C    | 12.443316 | 0.756756  | 1.394118  |
| C    | 11.905200 | -0.424976 | 1.893611  |
| C    | 12.737844 | -1.457781 | 2.319328  |
| C    | 14.132721 | -1.327910 | 2.255880  |
| C    | 15.020312 | -2.374394 | 2.684203  |
| C    | 16.368727 | -2.226057 | 2.615055  |
| C    | 16.961770 | -1.015674 | 2.114465  |
| C    | 18.345425 | -0.839932 | 2.049835  |
| C    | 18.911163 | 0.343582  | 1.574387  |
| C    | 20.418242 | 0.485764  | 1.622620  |
| C    | 20.942060 | 1.526246  | 0.645181  |
| C    | 20.188112 | 2.841324  | 0.804105  |
| C    | 18.686741 | 2.667789  | 0.550184  |
| C    | 18.092772 | 1.392504  | 1.125880  |
| C    | 16.682101 | 1.247899  | 1.172039  |
| C    | 15.781554 | 2.278304  | 0.724013  |
| C    | 14.431558 | 2.128162  | 0.795925  |
| C    | 13.833932 | 0.931467  | 1.312068  |
| C    | 14.694481 | -0.117328 | 1.748492  |
| C    | 16.111223 | 0.042034  | 1.677112  |
| O    | 21.031026 | -0.779479 | 1.380491  |
| O    | 22.330456 | 1.691142  | 0.967044  |
| O    | 20.356277 | 3.349283  | 2.126564  |
| H    | 11.787913 | 1.555675  | 1.061659  |
| H    | 10.828345 | -0.544435 | 1.951017  |
| H    | 12.308409 | -2.377012 | 2.705583  |
| H    | 14.588424 | -3.293844 | 3.067349  |
| H    | 17.026874 | -3.024975 | 2.942605  |
| H    | 19.001088 | -1.637659 | 2.378420  |
| H    | 20.690744 | 0.828489  | 2.630226  |
| H    | 20.831761 | 1.146430  | -0.376957 |
| H    | 20.558255 | 3.568779  | 0.070763  |
| H    | 18.201672 | 3.538738  | 0.997844  |
| H    | 16.189679 | 3.182877  | 0.294029  |
| H    | 13.779488 | 2.925482  | 0.452105  |
| H    | 21.983871 | -0.627013 | 1.427665  |
| H    | 22.789441 | 2.069474  | 0.208008  |
| O    | 18.419021 | 2.775214  | -0.859539 |
| H    | 18.463535 | 1.895093  | -1.252531 |
| H    | 21.302325 | 3.303282  | 2.322002  |

Table S60: B3LYP 6-311+g\* Tetrol coordinates (Å).

| Atom | x         | y         | z         |
|------|-----------|-----------|-----------|
| C    | 12.441937 | 0.761590  | 1.404154  |
| C    | 11.904347 | -0.420879 | 1.904137  |
| C    | 12.738386 | -1.454272 | 2.327675  |
| C    | 14.133526 | -1.324147 | 2.260853  |
| C    | 15.021510 | -2.370737 | 2.688545  |
| C    | 16.370466 | -2.222811 | 2.616139  |
| C    | 16.962238 | -1.013441 | 2.110651  |
| C    | 18.346372 | -0.839831 | 2.041873  |
| C    | 18.913528 | 0.338822  | 1.554744  |
| C    | 20.423743 | 0.473128  | 1.597960  |
| C    | 20.955100 | 1.545913  | 0.658146  |
| C    | 20.178753 | 2.848517  | 0.819877  |
| C    | 18.689704 | 2.652579  | 0.516039  |
| C    | 18.093707 | 1.387650  | 1.106949  |
| C    | 16.682292 | 1.249421  | 1.166788  |
| C    | 15.780028 | 2.283224  | 0.729812  |
| C    | 14.429430 | 2.134574  | 0.807205  |
| C    | 13.832894 | 0.935452  | 1.318902  |
| C    | 14.694485 | -0.113995 | 1.751422  |
| C    | 16.111444 | 0.044257  | 1.674405  |
| O    | 21.022650 | -0.793105 | 1.305426  |
| O    | 22.337795 | 1.723227  | 1.002001  |
| O    | 20.286724 | 3.347526  | 2.154363  |
| H    | 11.785951 | 1.561347  | 1.074737  |
| H    | 10.827586 | -0.540201 | 1.964009  |
| H    | 12.309728 | -2.373524 | 2.714880  |
| H    | 14.590408 | -3.289590 | 3.074088  |
| H    | 17.028798 | -3.021668 | 2.943513  |
| H    | 18.999140 | -1.637377 | 2.376700  |
| H    | 20.706841 | 0.764019  | 2.618323  |
| H    | 20.872189 | 1.193458  | -0.375918 |
| H    | 20.562896 | 3.593011  | 0.112585  |
| H    | 18.180133 | 3.531754  | 0.915767  |
| H    | 16.182106 | 3.198354  | 0.315556  |
| H    | 13.777255 | 2.935500  | 0.472031  |
| H    | 21.978840 | -0.682671 | 1.396343  |
| H    | 22.816744 | 2.093223  | 0.250257  |
| O    | 18.478256 | 2.713263  | -0.909551 |
| H    | 18.484058 | 1.818907  | -1.273862 |
| H    | 21.225869 | 3.372851  | 2.385325  |

Table S61: BPW91 6-311g\* hydrogen bonded structure (Å).

| Atom | x         | y         | z         |
|------|-----------|-----------|-----------|
| C    | 0.583539  | 4.177554  | 1.587857  |
| C    | 0.069264  | 2.755728  | 1.666727  |
| C    | 0.518505  | 1.801080  | 0.722626  |
| C    | 1.597264  | 2.181878  | -0.226470 |
| C    | 2.377718  | 3.415933  | -0.001085 |
| C    | 2.072804  | 4.244785  | 1.222421  |
| C    | -0.023894 | 0.485381  | 0.724990  |
| C    | -0.985915 | 0.129476  | 1.732924  |
| C    | -1.402832 | 1.101537  | 2.698856  |
| C    | -0.871278 | 2.404135  | 2.634733  |
| C    | -1.532316 | -1.191188 | 1.780458  |
| C    | -1.133046 | -2.170760 | 0.813779  |
| C    | -0.188133 | -1.782586 | -0.194990 |
| C    | 0.344213  | -0.520882 | -0.240693 |
| C    | -2.483041 | -1.543838 | 2.796618  |
| C    | -3.002137 | -2.855453 | 2.824017  |
| C    | -2.603981 | -3.803447 | 1.876419  |
| C    | -1.681308 | -3.468423 | 0.880356  |
| C    | -2.357335 | 0.722536  | 3.704281  |
| C    | -2.873707 | -0.544785 | 3.752982  |
| O    | 1.364491  | 3.406138  | -1.047154 |
| O    | 2.357541  | 5.645808  | 1.046382  |
| O    | 0.356282  | 4.864661  | 2.819232  |
| O    | 2.640115  | 3.088889  | -3.502388 |
| As   | 2.643438  | 1.355983  | -3.982240 |
| O    | 2.694459  | 0.329000  | -2.666506 |
| C    | 1.056550  | 1.137497  | -5.091372 |
| C    | 4.218029  | 1.331698  | -5.118399 |
| H    | -1.193452 | 3.152909  | 3.359139  |
| H    | 1.044358  | -0.276781 | -1.042441 |
| H    | 0.104494  | -2.521176 | -0.945861 |
| H    | -1.376277 | -4.214065 | 0.142190  |
| H    | -3.017488 | -4.813476 | 1.914254  |
| H    | -3.724196 | -3.125740 | 3.598285  |
| H    | -3.597560 | -0.815385 | 4.525630  |
| H    | -2.666223 | 1.472400  | 4.436635  |
| H    | 2.075493  | 1.398612  | -0.818657 |
| H    | 3.404263  | 3.460514  | -0.379409 |
| H    | 2.659837  | 3.838983  | 2.066208  |
| H    | 0.040998  | 4.694407  | 0.772110  |
| H    | 3.291477  | 5.798875  | 1.265684  |
| H    | 0.790629  | 5.730391  | 2.701056  |
| H    | 1.069026  | 1.884331  | -5.893554 |
| H    | 0.170974  | 1.275830  | -4.460667 |
| H    | 1.056992  | 0.126631  | -5.516339 |
| H    | 4.135171  | 2.127335  | -5.867723 |
| H    | 2.109763  | 3.210402  | -2.668947 |
| H    | 4.283008  | 0.355254  | -5.612252 |
| H    | 5.100299  | 1.493649  | -4.489380 |

Table S62: BPW91 6-311+g\* hydrogen bonded structure (Å).

| Atom | x         | y         | z         |
|------|-----------|-----------|-----------|
| C    | 0.609157  | 4.178550  | 1.617049  |
| C    | 0.083780  | 2.758229  | 1.685293  |
| C    | 0.548826  | 1.798028  | 0.754311  |
| C    | 1.650956  | 2.167205  | -0.170551 |
| C    | 2.432381  | 3.398412  | 0.063406  |
| C    | 2.104270  | 4.241779  | 1.270641  |
| C    | 0.000071  | 0.484636  | 0.747792  |
| C    | -0.988745 | 0.136631  | 1.731746  |
| C    | -1.424421 | 1.114017  | 2.683503  |
| C    | -0.883932 | 2.413794  | 2.629780  |
| C    | -1.541995 | -1.181699 | 1.770779  |
| C    | -1.123434 | -2.166601 | 0.817895  |
| C    | -0.152492 | -1.786443 | -0.169173 |
| C    | 0.386216  | -0.526729 | -0.205148 |
| C    | -2.518926 | -1.526183 | 2.764533  |
| C    | -3.043849 | -2.835911 | 2.784978  |
| C    | -2.626402 | -3.789768 | 1.850935  |
| C    | -1.678379 | -3.462185 | 0.875778  |
| C    | -2.406393 | 0.743917  | 3.665972  |
| C    | -2.929418 | -0.521485 | 3.706882  |
| O    | 1.448538  | 3.383196  | -1.010094 |
| O    | 2.398492  | 5.641203  | 1.079497  |
| O    | 0.360218  | 4.860267  | 2.851821  |
| O    | 2.531261  | 3.098111  | -3.567674 |
| As   | 2.656795  | 1.358472  | -4.031122 |
| O    | 2.852297  | 0.364774  | -2.698233 |
| C    | 1.033981  | 0.993203  | -5.042969 |
| C    | 4.170670  | 1.438475  | -5.242959 |
| H    | -1.221894 | 3.164191  | 3.345255  |
| H    | 1.107880  | -0.289311 | -0.988806 |
| H    | 0.155454  | -2.528781 | -0.910265 |
| H    | -1.358712 | -4.212080 | 0.147922  |
| H    | -3.044749 | -4.798195 | 1.882803  |
| H    | -3.785880 | -3.100269 | 3.542498  |
| H    | -3.673935 | -0.785653 | 4.462134  |
| H    | -2.730313 | 1.497958  | 4.387683  |
| H    | 2.141738  | 1.377198  | -0.741421 |
| H    | 3.469727  | 3.431152  | -0.285848 |
| H    | 2.684525  | 3.849826  | 2.125297  |
| H    | 0.074894  | 4.705008  | 0.802916  |
| H    | 3.333552  | 5.800581  | 1.294659  |
| H    | 0.753241  | 5.747438  | 2.747119  |
| H    | 0.943409  | 1.722874  | -5.855952 |
| H    | 0.177751  | 1.073348  | -4.363621 |
| H    | 1.095071  | -0.022808 | -5.451314 |
| H    | 3.982370  | 2.205641  | -6.003239 |
| H    | 2.105795  | 3.190360  | -2.671473 |
| H    | 4.292395  | 0.458284  | -5.718657 |
| H    | 5.065031  | 1.689578  | -4.662033 |

Table S63: BLYP 6-311g\* hydrogen bonded structure (Å).

| Atom | x         | y         | z         |
|------|-----------|-----------|-----------|
| C    | 0.583395  | 4.186837  | 1.604239  |
| C    | 0.071677  | 2.754893  | 1.684416  |
| C    | 0.523372  | 1.798123  | 0.736522  |
| C    | 1.607336  | 2.180110  | -0.214554 |
| C    | 2.380957  | 3.426023  | -0.003137 |
| C    | 2.074192  | 4.266656  | 1.219555  |
| C    | -0.022527 | 0.478595  | 0.735814  |
| C    | -0.989038 | 0.121342  | 1.746301  |
| C    | -1.406184 | 1.095972  | 2.716585  |
| C    | -0.871712 | 2.401193  | 2.653414  |
| C    | -1.540188 | -1.202582 | 1.791805  |
| C    | -1.141684 | -2.184820 | 0.820454  |
| C    | -0.192840 | -1.794524 | -0.190170 |
| C    | 0.343330  | -0.531727 | -0.234610 |
| C    | -2.495541 | -1.556146 | 2.810377  |
| C    | -3.018474 | -2.870133 | 2.834642  |
| C    | -2.620915 | -3.819555 | 1.883265  |
| C    | -1.694862 | -3.484401 | 0.885714  |
| C    | -2.365140 | 0.714928  | 3.723788  |
| C    | -2.884994 | -0.553564 | 3.770563  |
| O    | 1.361821  | 3.410717  | -1.059058 |
| O    | 2.343267  | 5.679426  | 1.020681  |
| O    | 0.366379  | 4.869149  | 2.853875  |
| O    | 2.666421  | 3.095796  | -3.516107 |
| As   | 2.654977  | 1.351219  | -4.003977 |
| O    | 2.687585  | 0.315103  | -2.683898 |
| C    | 1.055506  | 1.152772  | -5.132969 |
| C    | 4.251373  | 1.318741  | -5.141933 |
| H    | -1.194644 | 3.148792  | 3.377739  |
| H    | 1.042300  | -0.289228 | -1.036157 |
| H    | 0.098226  | -2.532373 | -0.942212 |
| H    | -1.391931 | -4.230031 | 0.146944  |
| H    | -3.036733 | -4.828550 | 1.919188  |
| H    | -3.741549 | -3.140830 | 3.607556  |
| H    | -3.609667 | -0.823547 | 4.542431  |
| H    | -2.672975 | 1.464236  | 4.456905  |
| H    | 2.085971  | 1.397779  | -0.803350 |
| H    | 3.406414  | 3.477459  | -0.383104 |
| H    | 2.676608  | 3.882269  | 2.061442  |
| H    | 0.026986  | 4.709942  | 0.803891  |
| H    | 3.282078  | 5.844932  | 1.221882  |
| H    | 0.777007  | 5.748269  | 2.732570  |
| H    | 1.079535  | 1.905839  | -5.928892 |
| H    | 0.170309  | 1.295644  | -4.502921 |
| H    | 1.049454  | 0.144671  | -5.564012 |
| H    | 4.183668  | 2.127637  | -5.878316 |
| H    | 2.124648  | 3.223178  | -2.689228 |
| H    | 4.302576  | 0.348731  | -5.649604 |
| H    | 5.131106  | 1.457275  | -4.504028 |

Table S64: BLYP 6-311+g\* hydrogen bonded structure (Å).

| Atom | x         | y         | z         |
|------|-----------|-----------|-----------|
| C    | 0.614668  | 4.191351  | 1.646440  |
| C    | 0.091828  | 2.760099  | 1.711785  |
| C    | 0.565410  | 1.797511  | 0.780114  |
| C    | 1.676489  | 2.168093  | -0.141408 |
| C    | 2.448290  | 3.412169  | 0.079595  |
| C    | 2.111930  | 4.270099  | 1.281860  |
| C    | 0.013185  | 0.480127  | 0.766905  |
| C    | -0.988631 | 0.131310  | 1.744775  |
| C    | -1.432228 | 1.111695  | 2.696891  |
| C    | -0.887109 | 2.413760  | 2.649145  |
| C    | -1.548111 | -1.189921 | 1.776524  |
| C    | -1.122244 | -2.177891 | 0.822812  |
| C    | -0.137169 | -1.796898 | -0.156544 |
| C    | 0.406293  | -0.536136 | -0.186183 |
| C    | -2.539242 | -1.534364 | 2.763478  |
| C    | -3.069863 | -2.845934 | 2.775564  |
| C    | -2.645225 | -3.801727 | 1.841304  |
| C    | -1.684085 | -3.474943 | 0.873646  |
| C    | -2.427887 | 0.740465  | 3.672365  |
| C    | -2.956262 | -0.525750 | 3.706137  |
| O    | 1.464647  | 3.388070  | -1.009997 |
| O    | 2.388994  | 5.681609  | 1.061445  |
| O    | 0.373624  | 4.863602  | 2.903483  |
| O    | 2.544544  | 3.096490  | -3.590613 |
| As   | 2.666542  | 1.342038  | -4.062566 |
| O    | 2.874159  | 0.340645  | -2.724946 |
| C    | 1.016683  | 0.978773  | -5.068673 |
| C    | 4.185101  | 1.430752  | -5.298099 |
| H    | -1.231484 | 3.162537  | 3.362033  |
| H    | 1.135657  | -0.301388 | -0.961709 |
| H    | 0.176391  | -2.538855 | -0.895169 |
| H    | -1.360629 | -4.224910 | 0.148111  |
| H    | -3.067305 | -4.808420 | 1.866992  |
| H    | -3.820196 | -3.109852 | 3.524481  |
| H    | -3.708665 | -0.788469 | 4.453536  |
| H    | -2.756470 | 1.493917  | 4.392037  |
| H    | 2.171236  | 1.378518  | -0.705191 |
| H    | 3.486491  | 3.452144  | -0.265231 |
| H    | 2.707982  | 3.905541  | 2.136293  |
| H    | 0.064768  | 4.726672  | 0.851154  |
| H    | 3.328517  | 5.856872  | 1.257259  |
| H    | 0.723467  | 5.770827  | 2.797759  |
| H    | 0.922188  | 1.711686  | -5.877996 |
| H    | 0.169319  | 1.059884  | -4.378736 |
| H    | 1.073952  | -0.036487 | -5.478824 |
| H    | 3.988756  | 2.204653  | -6.049240 |
| H    | 2.125557  | 3.192237  | -2.690314 |
| H    | 4.299947  | 0.453636  | -5.781379 |
| H    | 5.083061  | 1.676400  | -4.720779 |

Table S65: B1LYP 6-311g\* hydrogen bonded structure (Å).

| Atom | x         | y         | z         |
|------|-----------|-----------|-----------|
| C    | 0.594154  | 4.168896  | 1.596281  |
| C    | 0.079919  | 2.747202  | 1.669151  |
| C    | 0.537611  | 1.795518  | 0.737957  |
| C    | 1.625515  | 2.177869  | -0.201683 |
| C    | 2.396572  | 3.405964  | 0.027819  |
| C    | 2.079506  | 4.240525  | 1.239572  |
| C    | -0.000268 | 0.488064  | 0.735292  |
| C    | -0.971821 | 0.136157  | 1.723827  |
| C    | -1.400708 | 1.104472  | 2.675391  |
| C    | -0.870842 | 2.399435  | 2.618876  |
| C    | -1.518122 | -1.182297 | 1.766355  |
| C    | -1.106553 | -2.158050 | 0.813602  |
| C    | -0.147872 | -1.771612 | -0.182074 |
| C    | 0.380714  | -0.520684 | -0.224028 |
| C    | -2.478348 | -1.530224 | 2.763069  |
| C    | -2.995405 | -2.833944 | 2.786680  |
| C    | -2.584793 | -3.779926 | 1.852182  |
| C    | -1.651733 | -3.448418 | 0.873948  |
| C    | -2.370724 | 0.727794  | 3.666360  |
| C    | -2.883505 | -0.528640 | 3.710039  |
| O    | 1.399389  | 3.386025  | -1.016411 |
| O    | 2.359211  | 5.629810  | 1.048076  |
| O    | 0.361889  | 4.839966  | 2.826984  |
| O    | 2.594760  | 3.063883  | -3.509375 |
| As   | 2.605966  | 1.350890  | -3.980443 |
| O    | 2.657027  | 0.349265  | -2.662864 |
| C    | 1.021854  | 1.127075  | -5.071756 |
| C    | 4.173700  | 1.314702  | -5.107876 |
| H    | -1.200661 | 3.142940  | 3.332246  |
| H    | 1.084128  | -0.279639 | -1.011149 |
| H    | 0.151683  | -2.507334 | -0.921006 |
| H    | -1.338440 | -4.190505 | 0.147882  |
| H    | -2.995617 | -4.782348 | 1.885946  |
| H    | -3.723845 | -3.100707 | 3.544463  |
| H    | -3.613887 | -0.796343 | 4.465739  |
| H    | -2.687440 | 1.474782  | 4.385918  |
| H    | 2.103576  | 1.398918  | -0.779604 |
| H    | 3.417434  | 3.458006  | -0.340130 |
| H    | 2.660238  | 3.851931  | 2.084029  |
| H    | 0.055956  | 4.688649  | 0.793613  |
| H    | 3.290469  | 5.794543  | 1.224058  |
| H    | 0.747085  | 5.718643  | 2.727081  |
| H    | 1.025055  | 1.865891  | -5.871251 |
| H    | 0.145340  | 1.264815  | -4.440855 |
| H    | 1.017690  | 0.122624  | -5.492560 |
| H    | 4.094506  | 2.096284  | -5.861541 |
| H    | 2.103749  | 3.207734  | -2.673158 |
| H    | 4.242584  | 0.340587  | -5.589228 |
| H    | 5.050178  | 1.483046  | -4.485123 |

Table S66: BPW91 6-311g\* hydrogen bonded structure (Å).

| Atom | x         | y         | z         |
|------|-----------|-----------|-----------|
| C    | 0.621056  | 4.177330  | 1.629155  |
| C    | 0.099911  | 2.755460  | 1.688219  |
| C    | 0.583567  | 1.798508  | 0.775386  |
| C    | 1.698563  | 2.172670  | -0.133879 |
| C    | 2.464080  | 3.401188  | 0.106872  |
| C    | 2.114189  | 4.249651  | 1.299713  |
| C    | 0.043527  | 0.491550  | 0.761378  |
| C    | -0.963479 | 0.146515  | 1.715838  |
| C    | -1.422754 | 1.120435  | 2.646976  |
| C    | -0.885651 | 2.413544  | 2.605341  |
| C    | -1.514335 | -1.170764 | 1.745380  |
| C    | -1.070826 | -2.152490 | 0.813285  |
| C    | -0.075569 | -1.773740 | -0.149159 |
| C    | 0.456495  | -0.523240 | -0.177927 |
| C    | -2.511178 | -1.511035 | 2.708188  |
| C    | -3.032344 | -2.813774 | 2.720239  |
| C    | -2.590038 | -3.766297 | 1.806018  |
| C    | -1.620851 | -3.441867 | 0.860154  |
| C    | -2.430101 | 0.752014  | 3.603821  |
| C    | -2.948318 | -0.503406 | 3.634744  |
| O    | 1.501295  | 3.371111  | -0.969316 |
| O    | 2.399980  | 5.637723  | 1.093564  |
| O    | 0.359242  | 4.842589  | 2.860943  |
| O    | 2.494174  | 3.054921  | -3.560579 |
| As   | 2.587441  | 1.334537  | -4.018990 |
| O    | 2.766617  | 0.359550  | -2.686648 |
| C    | 0.958381  | 0.999347  | -5.009027 |
| C    | 4.094376  | 1.372240  | -5.224951 |
| H    | -1.239163 | 3.158697  | 3.305425  |
| H    | 1.189275  | -0.288459 | -0.939160 |
| H    | 0.249549  | -2.513810 | -0.872716 |
| H    | -1.283383 | -4.188500 | 0.149701  |
| H    | -3.004312 | -4.767604 | 1.830087  |
| H    | -3.788762 | -3.074775 | 3.452245  |
| H    | -3.707057 | -0.764962 | 4.364233  |
| H    | -2.770643 | 1.503122  | 4.308069  |
| H    | 2.193639  | 1.387920  | -0.688206 |
| H    | 3.496799  | 3.446156  | -0.227194 |
| H    | 2.684008  | 3.876981  | 2.158230  |
| H    | 0.094123  | 4.703876  | 0.824313  |
| H    | 3.330186  | 5.812222  | 1.271924  |
| H    | 0.691286  | 5.744375  | 2.772500  |
| H    | 0.871516  | 1.723887  | -5.816905 |
| H    | 0.115046  | 1.094856  | -4.327279 |
| H    | 0.993805  | -0.010587 | -5.415145 |
| H    | 3.925469  | 2.131374  | -5.987080 |
| H    | 2.111819  | 3.181439  | -2.665673 |
| H    | 4.197880  | 0.393595  | -5.690912 |
| H    | 4.988347  | 1.608163  | -4.650876 |



Table S67: B3LYP 6-311g\* hydrogen bonded structure (Å).

| Atom | x         | y         | z         |
|------|-----------|-----------|-----------|
| C    | -0.868622 | 2.405852  | 2.621295  |
| C    | 0.087685  | 2.754647  | 1.676976  |
| C    | 0.549522  | 1.804213  | 0.745485  |
| C    | 0.008303  | 0.497148  | 0.735614  |
| C    | 0.391508  | -0.508513 | -0.224734 |
| C    | -0.140230 | -1.759792 | -0.189299 |
| C    | -1.103409 | -2.147417 | 0.800513  |
| C    | -1.651482 | -3.437620 | 0.854815  |
| C    | -2.589444 | -3.770671 | 1.828448  |
| C    | -3.002659 | -2.826643 | 2.764421  |
| C    | -2.483418 | -1.522915 | 2.747162  |
| C    | -2.890922 | -0.524044 | 3.694849  |
| C    | -2.375547 | 0.733007  | 3.657116  |
| C    | -1.401116 | 1.110930  | 2.672093  |
| C    | -0.969171 | 0.143988  | 1.719035  |
| C    | -1.517729 | -1.173253 | 1.755056  |
| C    | 1.644990  | 2.185140  | -0.184183 |
| C    | 2.418170  | 3.411490  | 0.053466  |
| C    | 2.093607  | 4.243593  | 1.264883  |
| C    | 0.604993  | 4.174904  | 1.610008  |
| O    | 1.429190  | 3.397827  | -1.001235 |
| O    | 2.378193  | 5.634047  | 1.081267  |
| O    | 0.364322  | 4.847190  | 2.839152  |
| H    | -1.200883 | 3.149050  | 3.335704  |
| H    | 1.099565  | -0.265833 | -1.009088 |
| H    | 0.161437  | -2.494321 | -0.930241 |
| H    | -1.335973 | -4.178685 | 0.126974  |
| H    | -3.002407 | -4.773573 | 1.857447  |
| H    | -3.735482 | -3.094733 | 3.519130  |
| H    | -3.625814 | -0.793014 | 4.447358  |
| H    | -2.694733 | 1.479027  | 4.378307  |
| H    | 2.125871  | 1.405665  | -0.761839 |
| H    | 3.443953  | 3.460386  | -0.304686 |
| H    | 2.666871  | 3.849531  | 2.113575  |
| H    | 0.074397  | 4.696398  | 0.801393  |
| H    | 3.309345  | 5.795414  | 1.269638  |
| H    | 0.761618  | 5.722906  | 2.742143  |
| H    | 0.977302  | 1.761426  | -5.880936 |
| H    | 0.129219  | 1.130130  | -4.442377 |
| H    | 1.058980  | 0.022287  | -5.485554 |
| C    | 1.011570  | 1.030410  | -5.073731 |
| As   | 2.583443  | 1.347803  | -3.986251 |
| H    | 4.040436  | 2.118553  | -5.885093 |
| O    | 2.479926  | 3.069007  | -3.549451 |
| H    | 2.107521  | 3.185180  | -2.646772 |
| H    | 4.248974  | 0.371243  | -5.588767 |
| C    | 4.149147  | 1.350060  | -5.120221 |
| O    | 2.683414  | 0.377767  | -2.645510 |
| H    | 5.022448  | 1.557043  | -4.503033 |

Table S68: B3LYP 6-311+g\* hydrogen bonded structure (Å).

| Atom | x         | y         | z         |
|------|-----------|-----------|-----------|
| C    | 0.618214  | 4.178799  | 1.627824  |
| C    | 0.098051  | 2.757215  | 1.687480  |
| C    | 0.577703  | 1.801961  | 0.769714  |
| C    | 1.689677  | 2.176296  | -0.141480 |
| C    | 2.456625  | 3.405436  | 0.098010  |
| C    | 2.110416  | 4.252082  | 1.293105  |
| C    | 0.036434  | 0.494500  | 0.754558  |
| C    | -0.965221 | 0.146746  | 1.714867  |
| C    | -1.418836 | 1.118752  | 2.652239  |
| C    | -0.882274 | 2.412822  | 2.609854  |
| C    | -1.515636 | -1.170218 | 1.744174  |
| C    | -1.078303 | -2.149720 | 0.805465  |
| C    | -0.090223 | -1.768182 | -0.162160 |
| C    | 0.442621  | -0.516525 | -0.190357 |
| C    | -2.506402 | -1.513747 | 2.713424  |
| C    | -3.027261 | -2.817361 | 2.725046  |
| C    | -2.591096 | -3.767295 | 1.804584  |
| C    | -1.628379 | -3.439845 | 0.852581  |
| C    | -2.419024 | 0.747544  | 3.614310  |
| C    | -2.937071 | -0.509394 | 3.645362  |
| O    | 1.490926  | 3.377643  | -0.977743 |
| O    | 2.394835  | 5.642040  | 1.089586  |
| O    | 0.359794  | 4.845146  | 2.860709  |
| O    | 2.499313  | 3.056406  | -3.556004 |
| As   | 2.592631  | 1.331901  | -4.010221 |
| O    | 2.767065  | 0.357074  | -2.674767 |
| C    | 0.966193  | 0.994988  | -5.006368 |
| C    | 4.103905  | 1.367464  | -5.212576 |
| H    | -1.232235 | 3.157330  | 3.314286  |
| H    | 1.171218  | -0.279151 | -0.956800 |
| H    | 0.230103  | -2.506588 | -0.891287 |
| H    | -1.295397 | -4.185027 | 0.136752  |
| H    | -3.005432 | -4.769803 | 1.828631  |
| H    | -3.779219 | -3.080911 | 3.462416  |
| H    | -3.691433 | -0.773343 | 4.380228  |
| H    | -2.755546 | 1.497256  | 4.323740  |
| H    | 2.184426  | 1.391214  | -0.698626 |
| H    | 3.489953  | 3.449129  | -0.238360 |
| H    | 2.683676  | 3.877085  | 2.149952  |
| H    | 0.088348  | 4.705609  | 0.823083  |
| H    | 3.326526  | 5.816221  | 1.269644  |
| H    | 0.700624  | 5.745534  | 2.770875  |
| H    | 0.883221  | 1.718516  | -5.816819 |
| H    | 0.119702  | 1.092630  | -4.327357 |
| H    | 1.003232  | -0.016837 | -5.410189 |
| H    | 3.937072  | 2.126912  | -5.976206 |
| H    | 2.108628  | 3.183129  | -2.661602 |
| H    | 4.207652  | 0.387419  | -5.677732 |
| H    | 4.997078  | 1.603383  | -4.635523 |

## References

- [1] Dale L. Whalen, Jean A. Montemarano, Dhiren R. Thakker, Haruhiko Yagi, and Donald M. Jerina. Changes of mechanisms and product distributions in the hydrolysis of benzo[a]pyrene-7,8-diol 9,10,-epoxide metabolites induced by changes in ph. *J. Am. Chem. Soc.*, 99(16):5522–5524, 1977.
- [2] D.P. Michaud, S.C. Gupta, D.L. Whalen, J.M. Sayer, and D.M. Jerina. Effects of ph and salt concentration on the hydrolysis of a benzo[a]pyrene 7,8-diol-9,10-epoxide catalyzed by {DNA} and polyadenylic acid. *Chem. Biol. Interact.*, 44(12):41 – 52, 1983.
- [3] Nicholas E. Geacintov, Hanina Hibshoosh, Victor Ibanez, Maurice J. Benjamin, and Ronald G. Harvey. Mechanisms of reaction of benzo(a)pyrene-7,8-diol-9,10-epoxide with dna in aqueous solutions. *Biophys. Chem.*, 20:121–133, 1984.
